# Supplementary material
Source: bioRxiv or medRxiv preprint supplement (https://www.biorxiv.org/highwire/filestream/75496/field_highwire_adjunct_files/0/246900-1.pdf)
Supplement: Supplementary file [file 246900-1.pdf]

Table S1. HDL-miRNA levels (mean) by real-time PCR TaqMan assays, as reported by relative quantitative values (RQV).

|          | miR-181a | miR-10b | miR-26a | miR-146a | miR-338-5p | miR-92a | miR-223 | miR-375 | miR-451 |
|----------|----------|---------|---------|----------|------------|---------|---------|---------|---------|
| WT       | 0.10     | 0.07    | 0.49    | 7.51     | 5.74       | 13.14   | 11.77   | 1.25    | 76.91   |
| SR-BI KO | 0.09     | 0.08    | 0.39    | 7.81     | 5.47       | 20.54   | 13.09   | 2.12    | 102.21  |

**Table S2. Multivariate analysis of sRNA profiles compared to liver profiles (WT only).**

| Group | Class    | Level    | Dispersion_Fvalue | Dispersion_pvalue | Permanova_Fvalue | Permanova_pvalue |
|-------|----------|----------|-------------------|-------------------|------------------|------------------|
| APOB  | All_host | Parent   | 39.59             | 7.33E-12          | 9.82             | 1.00E-03         |
| HDL   | All_host | Parent   | 32.11             | 4.43E-10          | 8.71             | 1.00E-03         |
| Bile  | All_host | Parent   | 41.74             | 2.87E-12          | 12.53            | 1.00E-03         |
| Urine | All_host | Parent   | 30.31             | 6.01E-10          | 7.03             | 1.00E-03         |
| APOB  | lincRNA  | Parent   | 7.72              | 1.01E-03          | 9.24             | 1.00E-03         |
| HDL   | lincRNA  | Parent   | 7.95              | 8.33E-04          | 7.48             | 1.00E-03         |
| Bile  | lincRNA  | Parent   | 16.21             | 2.10E-06          | 9.23             | 1.00E-03         |
| Urine | lincRNA  | Parent   | 8.37              | 5.99E-04          | 9.50             | 1.00E-03         |
| APOB  | miRNA    | Parent   | 31.03             | 4.18E-10          | 9.57             | 1.00E-03         |
| HDL   | miRNA    | Parent   | 23.20             | 2.82E-08          | 7.11             | 1.00E-03         |
| Bile  | miRNA    | Parent   | 17.09             | 1.78E-06          | 5.56             | 1.00E-03         |
| Urine | miRNA    | Parent   | 15.47             | 3.42E-06          | 8.42             | 1.00E-03         |
| APOB  | miscRNA  | Parent   | 15.91             | 2.55E-06          | 7.05             | 1.00E-03         |
| HDL   | miscRNA  | Parent   | 7.85              | 9.07E-04          | 6.44             | 1.00E-03         |
| Bile  | miscRNA  | Parent   | 18.50             | 4.77E-07          | 9.17             | 1.00E-03         |
| Urine | miscRNA  | Parent   | 11.66             | 4.91E-05          | 7.47             | 1.00E-03         |
| APOB  | rRNA     | Parent   | 12.03             | 3.75E-05          | 17.19            | 1.00E-03         |
| HDL   | rRNA     | Parent   | 7.20              | 1.53E-03          | 15.67            | 1.00E-03         |
| Bile  | rRNA     | Parent   | 10.48             | 1.18E-04          | 15.39            | 1.00E-03         |
| Urine | rRNA     | Parent   | 5.40              | 6.85E-03          | 5.47             | 1.00E-03         |
| APOB  | snoRNA   | Parent   | 27.03             | 3.34E-09          | 7.70             | 1.00E-03         |
| HDL   | snoRNA   | Parent   | 28.49             | 1.54E-09          | 8.05             | 1.00E-03         |
| Bile  | snoRNA   | Parent   | 34.82             | 6.53E-11          | 9.36             | 1.00E-03         |
| Urine | snoRNA   | Parent   | 23.99             | 1.80E-08          | 6.96             | 1.00E-03         |
| APOB  | snRNA    | Parent   | 10.01             | 1.68E-04          | 2.85             | 2.70E-02         |
| HDL   | snRNA    | Parent   | 15.64             | 3.06E-06          | 8.91             | 1.00E-03         |
| Bile  | snRNA    | Parent   | 14.68             | 5.83E-06          | 3.58             | 1.00E-02         |
| Urine | snRNA    | Parent   | 10.15             | 1.51E-04          | 2.94             | 2.80E-02         |
| APOB  | tRNA     | Parent   | 42.41             | 2.15E-12          | 3.50             | 3.40E-02         |
| HDL   | tRNA     | Parent   | 34.77             | 6.68E-11          | 0.74             | 4.95E-01         |
| Bile  | tRNA     | Parent   | 29.00             | 1.18E-09          | 14.42            | 1.00E-03         |
| Urine | tRNA     | Parent   | 20.52             | 1.37E-07          | 9.50             | 1.00E-03         |
| APOB  | All_host | Fragment | 78.26             | <2.2e-16          | 7.81             | 1.00E-03         |
| HDL   | All_host | Fragment | 79.02             | <2.2e-16          | 7.29             | 1.00E-03         |
| Bile  | All_host | Fragment | 68.60             | <2.2e-16          | 8.88             | 1.00E-03         |
| Urine | All_host | Fragment | 50.33             | <2.2e-16          | 7.77             | 1.00E-03         |
| APOB  | miRNA    | Fragment | 35.96             | 3.82E-11          | 8.85             | 1.00E-03         |
| HDL   | miRNA    | Fragment | 29.30             | 1.01E-09          | 7.12             | 1.00E-03         |
| Bile  | miRNA    | Fragment | 22.15             | 5.19E-08          | 5.42             | 1.00E-03         |
| Urine | miRNA    | Fragment | 20.13             | 1.74E-07          | 7.65             | 1.00E-03         |
| APOB  | miscRNA  | Fragment | 146.61            | <2.2e-16          | 4.32             | 1.00E-03         |
| HDL   | miscRNA  | Fragment | 123.10            | <2.2e-16          | 5.89             | 1.00E-03         |
| Bile  | miscRNA  | Fragment | 79.49             | <2.2e-16          | 5.66             | 1.00E-03         |
| Urine | miscRNA  | Fragment | 137.23            | <2.2e-16          | 4.23             | 1.00E-03         |
| APOB  | rDR      | Fragment | 379.50            | <2.2e-16          | 6.27             | 1.00E-03         |
| HDL   | rDR      | Fragment | 335.62            | <2.2e-16          | 6.67             | 1.00E-03         |
| Bile  | rDR      | Fragment | 209.64            | <2.2e-16          | 8.07             | 1.00E-03         |
| Urine | rDR      | Fragment | 243.10            | <2.2e-16          | 7.26             | 1.00E-03         |
| APOB  | snoDR    | Fragment | 95.54             | <2.2e-16          | 5.76             | 1.00E-03         |
| HDL   | snoDR    | Fragment | 97.85             | <2.2e-16          | 6.45             | 1.00E-03         |
| Bile  | snoDR    | Fragment | 71.98             | <2.2e-16          | 7.26             | 1.00E-03         |
| Urine | snoDR    | Fragment | 82.83             | <2.2e-16          | 5.64             | 1.00E-03         |
| APOB  | snDR     | Fragment | 56.19             | 9.85E-15          | 4.73             | 1.00E-03         |
| HDL   | snDR     | Fragment | 68.87             | <2.2e-16          | 5.72             | 1.00E-03         |
| Bile  | snDR     | Fragment | 37.79             | 1.64E-11          | 4.89             | 1.00E-03         |
| Urine | snDR     | Fragment | 50.18             | 9.25E-14          | 3.44             | 1.00E-03         |
| APOB  | tDR      | Fragment | 41.70             | 2.92E-12          | 5.32             | 1.00E-03         |
| HDL   | tDR      | Fragment | 33.55             | 1.20E-10          | 2.94             | 1.40E-02         |
| Bile  | tDR      | Fragment | 22.95             | 3.15E-08          | 10.22            | 1.00E-03         |
| Urine | tDR      | Fragment | 16.27             | 2.01E-06          | 7.08             | 1.00E-03         |



|                 |      |     |      |      |      |     |      |      |      |      |
|-----------------|------|-----|------|------|------|-----|------|------|------|------|
| pab-miR951      | UND  | UND | UND  | 6.55 | UND  | UND | UND  | UND  | UND  | UND  |
| hsa-miR-3614-5p | UND  | UND | UND  | UND  | 4.78 | UND | UND  | UND  | UND  | UND  |
| hsa-miR-489-3p  | UND  | UND | UND  | UND  | UND  | UND | UND  | UND  | 0.30 | 2.80 |
| mdm-miR482a-5p  | UND  | UND | UND  | UND  | 4.06 | UND | UND  | UND  | UND  | UND  |
| aaU-miR396      | UND  | UND | UND  | UND  | 1.82 | UND | UND  | UND  | UND  | UND  |
| oha-miR-122-5p  | UND  | UND | UND  | UND  | UND  | UND | 0.38 | 0.46 | UND  | UND  |
| aae-miR-278-3p  | UND  | UND | 3.41 | UND  | UND  | UND | UND  | UND  | UND  | UND  |
| aly-miR166a-5p  | UND  | UND | UND  | UND  | 3.18 | UND | UND  | UND  | UND  | UND  |
| aga-miR-277     | UND  | UND | 3.21 | UND  | UND  | UND | UND  | UND  | UND  | UND  |
| cte-miR-750     | UND  | UND | 3.07 | UND  | UND  | UND | UND  | UND  | UND  | UND  |
| hsa-miR-937-3p  | UND  | UND | 4.50 | UND  | UND  | UND | UND  | UND  | UND  | UND  |
| ggo-miR-589     | 3.78 | UND | UND  | UND  | UND  | UND | UND  | UND  | UND  | UND  |
| aly-miR168a-5p  | UND  | UND | UND  | 0.74 | UND  | UND | 0.15 | UND  | UND  | UND  |
| gma-miR482b-3p  | 3.04 | UND | UND  | UND  | UND  | UND | UND  | UND  | UND  | UND  |
| sme-miR-31b-5p  | UND  | UND | UND  | UND  | UND  | UND | UND  | UND  | 1.99 | UND  |
| api-miR-2a      | UND  | UND | 1.94 | UND  | UND  | UND | UND  | UND  | UND  | UND  |
| sme-lin-4-5p    | UND  | UND | 2.45 | UND  | UND  | UND | UND  | UND  | UND  | UND  |
| aly-miR403a-3p  | UND  | UND | UND  | 1.02 | UND  | UND | UND  | UND  | UND  | UND  |
| sme-bantam-a    | UND  | UND | 1.57 | UND  | UND  | UND | UND  | UND  | UND  | UND  |
| aae-miR-8-3p    | UND  | UND | 1.14 | UND  | UND  | UND | UND  | UND  | UND  | UND  |
| hsa-miR-629-5p  | UND  | UND | 0.96 | UND  | UND  | UND | UND  | UND  | UND  | UND  |
| asu-miR-86-5p   | UND  | UND | 1.22 | UND  | UND  | UND | UND  | UND  | UND  | UND  |
| ata-miR396e-3p  | UND  | UND | 0.82 | UND  | UND  | UND | UND  | UND  | UND  | UND  |
| aaU-miR162      | UND  | UND | UND  | 0.39 | UND  | UND | UND  | UND  | UND  | UND  |
| aae-miR-34-5p   | UND  | UND | 0.87 | UND  | UND  | UND | UND  | UND  | UND  | UND  |
| ipu-miR-99b     | UND  | UND | 0.12 | 0.34 | UND  | UND | 0.14 | 0.09 | UND  | UND  |
| lva-miR-183-5p  | UND  | UND | 0.07 | 0.06 | UND  | UND | UND  | UND  | 0.36 | UND  |
| gma-miR171k-3p  | UND  | UND | UND  | 0.56 | UND  | UND | UND  | UND  | UND  | UND  |
| ahy-miR156b-5p  | UND  | UND | UND  | 0.69 | UND  | UND | UND  | UND  | UND  | UND  |
| hsa-miR-4661-5p | UND  | UND | UND  | 0.69 | UND  | UND | UND  | UND  | UND  | UND  |
| gso-miR3522a    | UND  | UND | UND  | 0.45 | UND  | UND | UND  | UND  | UND  | UND  |
| hsa-miR-3605-3p | UND  | UND | 0.70 | UND  | UND  | UND | UND  | UND  | UND  | UND  |
| hsa-miR-942-5p  | UND  | UND | UND  | 0.61 | UND  | UND | UND  | UND  | UND  | UND  |
| asu-miR-100a-5p | UND  | UND | 0.42 | UND  | UND  | UND | UND  | UND  | UND  | UND  |
| osa-miR159f     | 0.12 | UND | 0.41 | UND  | UND  | UND | UND  | UND  | UND  | UND  |

|                   |      |      |      |      |      |     |      |      |      |     |
|-------------------|------|------|------|------|------|-----|------|------|------|-----|
| bta-miR-3613a     | UND  | UND  | 0.24 | UND  | UND  | UND | UND  | UND  | UND  | UND |
| aqc-miR159        | UND  | UND  | 0.41 | UND  | UND  | UND | UND  | UND  | UND  | UND |
| pma-miR-194-5p    | UND  | UND  | UND  | UND  | UND  | UND | 0.12 | UND  | UND  | UND |
| aae-miR-13-3p     | UND  | UND  | UND  | UND  | UND  | UND | UND  | UND  | 0.18 | UND |
| hsa-miR-1269b     | UND  | UND  | 0.18 | UND  | UND  | UND | UND  | UND  | UND  | UND |
| pde-miR159        | UND  | UND  | 0.31 | UND  | UND  | UND | UND  | UND  | UND  | UND |
| bbe-miR-183-5p    | UND  | UND  | UND  | 0.11 | UND  | UND | UND  | UND  | UND  | UND |
| bta-miR-374a      | UND  | UND  | UND  | UND  | UND  | UND | UND  | 0.25 | UND  | UND |
| hsa-miR-6803-3p   | UND  | UND  | 0.09 | 0.08 | UND  | UND | UND  | UND  | UND  | UND |
| aly-miR172c-3p    | UND  | UND  | UND  | 0.11 | UND  | UND | UND  | UND  | UND  | UND |
| bma-miR-57        | UND  | UND  | UND  | UND  | 0.06 | UND | UND  | UND  | UND  | UND |
| cbn-miR-81        | UND  | UND  | UND  | UND  | UND  | UND | UND  | 0.12 | UND  | UND |
| asu-miR-44a-3p    | UND  | UND  | UND  | UND  | UND  | UND | UND  | 0.12 | UND  | UND |
| cin-let-7b-5p     | UND  | UND  | 0.09 | UND  | UND  | UND | UND  | UND  | UND  | UND |
| aae-miR-71-5p     | UND  | 0.07 | UND  | UND  | UND  | UND | UND  | UND  | UND  | UND |
| cte-miR-100       | UND  | UND  | 0.06 | UND  | UND  | UND | UND  | UND  | UND  | UND |
| aae-miR-10        | UND  | UND  | UND  | UND  | UND  | UND | UND  | 0.13 | UND  | UND |
| dvi-miR-310-3p    | UND  | UND  | UND  | UND  | 0.07 | UND | UND  | UND  | UND  | UND |
| aga-miR-275       | UND  | UND  | UND  | UND  | UND  | UND | UND  | 0.07 | UND  | UND |
| efu-miR-23a       | UND  | UND  | UND  | 0.08 | UND  | UND | UND  | UND  | UND  | UND |
| hsa-miR-181a-2-3p | UND  | UND  | UND  | 0.08 | UND  | UND | UND  | UND  | UND  | UND |
| hsa-miR-4433a-3p  | UND  | UND  | UND  | 0.07 | UND  | UND | UND  | UND  | UND  | UND |
| cfa-miR-590       | UND  | UND  | 0.06 | UND  | UND  | UND | UND  | UND  | UND  | UND |
| hsa-miR-625-3p    | UND  | UND  | UND  | UND  | 0.07 | UND | UND  | UND  | UND  | UND |
| mml-miR-133a      | UND  | 0.07 | UND  | UND  | UND  | UND | UND  | UND  | UND  | UND |
| oha-miR-221-5p    | UND  | UND  | UND  | UND  | UND  | UND | UND  | 0.09 | UND  | UND |
| pma-miR-30d       | UND  | UND  | UND  | UND  | UND  | UND | UND  | UND  | 0.06 | UND |
| vvi-miR156e       | 0.12 | UND  | UND  | UND  | UND  | UND | UND  | UND  | UND  | UND |
| xtr-miR-106       | UND  | UND  | UND  | UND  | UND  | UND | UND  | 0.07 | UND  | UND |
| xtr-miR-215       | UND  | UND  | UND  | UND  | UND  | UND | UND  | 0.07 | UND  | UND |

Table S4. Non-host tDRs (RPM)

| Name                                                             | APOB   |         | Bile   |       | HDL    |        | Liver  |      | Urine  |        |
|------------------------------------------------------------------|--------|---------|--------|-------|--------|--------|--------|------|--------|--------|
|                                                                  | SRBIKO | WT      | SRBIKO | WT    | SRBIKO | WT     | SRBIKO | WT   | SRBIKO | WT     |
| <i>Azotobacter_chroococcum_NCIMB_8003_tRNA-fMet-CAT-1-1</i>      | 406.59 | 1883.53 | 3.81   | 1.65  | 470.97 | 896.65 | 0.24   | 0.28 | 1.91   | 2.36   |
| <i>Bacillus_anthraxis_2000031021_tRNA-fMet-CAT-1-1</i>           | 342.82 | 1600.84 | 2.81   | 1.02  | 371.22 | 746.21 | 0.14   | 0.21 | 1.66   | 2.52   |
| <i>Marinomonas_mediterranea_MMB-1_tRNA-fMet-CAT-1-1</i>          | 372.40 | 667.50  | 2.78   | 0.95  | 508.11 | 757.97 | 0.22   | 0.18 | 0.52   | 1.38   |
| <i>Azotobacter_chroococcum_NCIMB_8003_tRNA-Asp-GTC-1-1</i>       | 289.05 | 259.24  | 16.91  | 10.29 | 755.71 | 486.88 | 0.69   | 0.48 | 10.09  | 130.03 |
| <i>Azotobacter_chroococcum_NCIMB_8003_tRNA-Glu-TTC-1-1</i>       | 199.88 | 527.80  | 1.86   | 1.51  | 425.53 | 562.52 | 0.34   | 0.22 | 4.92   | 103.80 |
| <i>Alteromonas_australis_DE170_tRNA-fMet-CAT-1-1</i>             | 183.01 | 394.68  | 2.15   | 1.18  | 281.00 | 429.81 | 0.11   | 0.17 | 0.33   | 0.40   |
| <i>Azotobacter_chroococcum_NCIMB_8003_tRNA-Ile-GAT-1-1</i>       | 123.26 | 37.56   | 5.05   | 1.28  | 411.82 | 554.90 | 0.16   | 0.17 | 0.85   | 3.70   |
| <i>Escherichia_coli_ETEC_H10407_tRNA-fMet-CAT-1-1</i>            | 135.34 | 596.56  | 1.06   | 0.28  | 143.47 | 278.48 | 0.08   | 0.09 | 0.61   | 0.91   |
| <i>Candidatus_Hamiltonella_defensa_5AT_Acyrtosiphon_pisum_1</i>  | 152.19 | 326.84  | 1.41   | 0.43  | 238.12 | 355.25 | 0.09   | 0.10 | 0.14   | 0.29   |
| <i>Propionibacterium_acidipropionici_ATCC_4875_tRNA-Asn-GTT-</i> | 259.00 | 181.66  | 12.41  | 6.24  | 267.05 | 339.82 | 0.55   | 0.21 | 34.81  | 115.59 |
| <i>Pseudomonas_alkylphenolia_KL28_tRNA-Leu-CAA-1-1</i>           | 69.34  | 93.13   | 1.15   | 0.10  | 530.75 | 337.68 | 0.23   | 0.13 | 0.21   | 0.07   |
| <i>Pseudomonas_alkylphenolia_KL28_tRNA-Tyr-GTA-1-1</i>           | 157.71 | 205.15  | 3.94   | 1.49  | 403.56 | 222.46 | 0.22   | 0.12 | 13.56  | 1.15   |
| <i>Pseudomonas_brassicacearum_DF41_tRNA-Asn-GTT-1-1</i>          | 15.93  | 49.97   | 0.26   | 0.22  | 242.56 | 441.83 | 0.19   | 0.17 | 0.63   | 0.14   |
| <i>Dyella_japonica_A8_tRNA-Asn-GTT-1-1</i>                       | 109.52 | 436.12  | 0.83   | 0.89  | 165.33 | 243.29 | 0.24   | 0.19 | 27.37  | 21.66  |
| <i>Hahella_chejuensis_KCTC_2396_tRNA-fMet-CAT-1-1</i>            | 82.18  | 391.77  | 1.18   | 0.31  | 91.82  | 179.39 | 0.03   | 0.05 | 0.40   | 0.59   |
| <i>Macropus_eugenii_GL115445.trna6-GluTTC</i>                    | 24.81  | 36.50   | 65.61  | 59.95 | 14.42  | 3.02   | 1.19   | 0.84 | 109.03 | 266.09 |
| <i>Dasyus_novemcinctus_AAGV03074463.trna2-GluCTC</i>             | 5.75   | 33.95   | 79.77  | 93.69 | 40.01  | 8.82   | 1.64   | 5.77 | 80.70  | 76.79  |
| <i>gamma_proteobacterium_HdN1_tRNA-Val-TAC-1-1</i>               | 14.02  | 27.68   | 6.25   | 0.15  | 431.46 | 230.91 | 0.32   | 0.13 | 0.07   | 0.04   |
| <i>Bacteroides_dorei_tRNA-Glu-TTC-1-1</i>                        | 153.69 | 309.08  | 40.20  | 5.31  | 81.87  | 123.04 | 0.26   | 0.14 | 5.72   | 1.93   |
| <i>Pseudomonas_cichorii_JBC1_tRNA-Ser-CGA-1-1</i>                | 136.35 | 87.36   | 2.42   | 0.89  | 194.80 | 158.98 | 0.15   | 0.19 | 0.11   | 0.07   |
| <i>Pseudomonas_fluorescens_A506_tRNA-Ala-GGC-1-1</i>             | 42.13  | 34.35   | 6.23   | 2.39  | 204.33 | 193.41 | 0.13   | 0.35 | 2.95   | 3.18   |
| <i>Pseudomonas_alkylphenolia_KL28_tRNA-Pro-TGG-1-1</i>           | 55.02  | 14.76   | 1.86   | 0.34  | 252.17 | 181.89 | 0.06   | 0.11 | 0.08   | 1.41   |
| <i>Lactobacillus_brevis_ATCC_367_tRNA-fMet-CAT-1-1</i>           | 70.38  | 152.01  | 0.13   | 0.18  | 105.29 | 165.25 | 0.04   | 0.04 | 0.06   | 0.11   |
| <i>Acinetobacter_baumannii_1656-2_tRNA-Val-TAC-1-1</i>           | 160.05 | 99.78   | 23.10  | 4.69  | 160.03 | 158.83 | 0.36   | 0.41 | 13.31  | 3.75   |
| <i>Acidovorax_avenae_subsp_avenae_ATCC_19860_tRNA-Ala-TC</i>     | 145.64 | 162.84  | 27.09  | 11.46 | 66.40  | 115.29 | 0.15   | 0.22 | 5.74   | 25.54  |
| <i>Acinetobacter_baumannii_1656-2_tRNA-Glu-TTC-1-1</i>           | 119.24 | 125.54  | 22.14  | 2.25  | 125.24 | 240.95 | 0.35   | 0.21 | 2.74   | 43.12  |
| <i>Pseudomonas_brassicacearum_DF41_tRNA-Arg-ACG-1-1</i>          | 95.13  | 51.10   | 1.18   | 1.24  | 134.26 | 350.77 | 0.13   | 0.17 | 6.53   | 3.83   |
| <i>Rhodocyclaceae_bacterium_PG1-Ca6_tRNA-Met-CAT-3-1</i>         | 182.94 | 190.75  | 1.89   | 0.45  | 67.33  | 78.56  | 0.23   | 0.17 | 8.39   | 1.72   |
| <i>Lachnoclostridium_phytofermentans_ISDg_tRNA-Asn-GTT-1-1</i>   | UND    | 0.10    | 0.46   | 1.88  | 0.11   | UND    | 0.14   | 0.92 | 80.97  | 6.73   |
| <i>Acinetobacter_baumannii_1656-2_tRNA-Arg-ACG-1-1</i>           | 173.84 | 73.25   | 11.69  | 4.50  | 157.20 | 92.22  | 0.24   | 0.31 | 8.53   | 63.57  |

|                                                               |        |        |       |       |        |        |      |       |       |        |
|---------------------------------------------------------------|--------|--------|-------|-------|--------|--------|------|-------|-------|--------|
| <i>Micrococcus_luteus_NCTC_2665_tRNA-Lys-CTT-1-1</i>          | 114.27 | 268.40 | 5.11  | 3.29  | 48.08  | 99.15  | 0.12 | 0.13  | 3.33  | 4.40   |
| <i>Pseudomonas_brassicacearum_DF41_tRNA-Ala-TGC-2-1</i>       | 27.34  | 35.41  | 1.95  | 3.34  | 112.24 | 114.62 | 0.14 | 0.08  | 0.23  | 222.81 |
| <i>Stenotrophomonas_maltophilia_13637_tRNA-Thr-GGT-1-1</i>    | 82.39  | 7.79   | 0.22  | 0.39  | 155.81 | 175.85 | 0.11 | UND   | 0.02  | 0.14   |
| <i>Geobacter_bemidjiensis_Bem_tRNA-fMet-CAT-1-1</i>           | 42.39  | 189.99 | 0.46  | 0.17  | 44.72  | 88.70  | 0.02 | 0.02  | 0.23  | 0.30   |
| <i>Geobacter_daltonii_FRC-32_tRNA-fMet-CAT-1-1</i>            | 40.58  | 190.11 | 0.33  | 0.08  | 43.61  | 88.40  | 0.05 | 0.03  | 0.19  | 0.29   |
| <i>Acidovorax_avenae_subsp_avenae_ATCC_19860_tRNA-Asp-G</i>   | 25.65  | 72.40  | 9.44  | 1.86  | 70.33  | 63.00  | 0.12 | 0.08  | 4.06  | 338.92 |
| <i>Trichechus_manatus_latirostris_JH594675.trna156-ArgTCT</i> | 6.65   | 32.29  | 68.29 | 45.93 | 0.16   | 0.57   | 4.51 | 10.14 | 82.88 | 49.63  |
| <i>Agrobacterium_fabrum_str_C58_tRNA-Asp-GTC-1-1</i>          | 127.87 | 186.24 | 0.72  | 0.94  | 43.70  | 32.52  | 0.20 | 0.09  | 1.09  | 0.94   |
| <i>Pseudomonas_fluorescens_A506_tRNA-His-GTG-1-1</i>          | 55.91  | 31.70  | 0.41  | 0.31  | 166.40 | 104.79 | 0.13 | 0.08  | 0.14  | 0.07   |
| <i>Pseudomonas_alkylphenolia_KL28_tRNA-Gly-TCC-1-1</i>        | 29.84  | 68.01  | 0.51  | 0.23  | 85.47  | 157.78 | 0.09 | 0.12  | 0.66  | 1.66   |
| <i>Arabidopsis_thaliana_TAIR10_Feb_2011_tRNA-Glu-TTC-4-1</i>  | 242.46 | 141.97 | 1.13  | 3.29  | 34.37  | 74.63  | 0.24 | 0.26  | 1.91  | 15.21  |
| <i>Tursiops_truncatus_JH472793.trna26-GluTTC</i>              | 1.91   | 11.04  | 51.15 | 60.24 | 2.87   | 2.11   | 0.31 | 0.94  | 35.92 | 41.22  |
| <i>Aeromonas_hydrophila_4AK4_tRNA-Phe-GAA-1-1</i>             | 19.38  | 9.22   | 1.71  | 1.41  | 54.18  | 189.26 | 0.04 | 0.08  | 1.31  | UND    |
| <i>Pseudomonas_fluorescens_A506_tRNA-Leu-CAG-1-1</i>          | 11.24  | 2.31   | 3.20  | 0.25  | 91.28  | 144.68 | 0.08 | 0.04  | 6.83  | 0.76   |
| <i>Acinetobacter_baumannii_1656-2_tRNA-Asp-GTC-1-1</i>        | 48.80  | 146.11 | 1.93  | 1.46  | 54.43  | 42.94  | 0.10 | 0.24  | 0.94  | 4.97   |
| <i>Alcanivorax_borkumensis_SK2_tRNA-Val-TAC-1-1</i>           | 117.11 | 296.54 | 4.07  | 0.15  | 88.98  | 31.72  | 0.08 | 0.18  | UND   | 0.05   |
| <i>Acinetobacter_baumannii_1656-2_tRNA-Leu-CAA-1-1</i>        | 89.96  | 70.53  | 8.47  | 5.13  | 95.97  | 62.39  | 0.17 | 0.13  | 1.58  | 10.64  |
| <i>Dyella_japonica_A8_tRNA-Glu-TTC-1-1</i>                    | 107.87 | 68.10  | 0.58  | 0.26  | 42.22  | 66.77  | 0.12 | 0.06  | 3.93  | 109.03 |
| <i>Pseudomonas_alkylphenolia_KL28_tRNA-Thr-GGT-1-1</i>        | 2.48   | 20.33  | 0.04  | 0.23  | 121.43 | 116.05 | 0.08 | UND   | 0.74  | 0.08   |
| <i>Aeromonas_hydrophila_4AK4_tRNA-Tyr-GTA-1-1</i>             | 31.53  | 39.06  | 2.25  | 0.09  | 106.16 | 87.54  | 0.08 | UND   | 2.43  | 0.03   |
| <i>Bacillus_cellulosilyticus_DSM_2522_tRNA-fMet-CAT-1-1</i>   | 28.98  | 135.57 | 0.24  | 0.07  | 31.39  | 63.14  | 0.01 | 0.02  | 0.14  | 0.21   |
| <i>Alcanivorax_pacificus_W11-5_tRNA-Ala-TGC-1-1</i>           | 8.92   | 125.55 | 1.19  | 2.28  | 38.07  | 251.98 | 0.06 | 0.08  | 0.23  | 0.02   |
| <i>Dyella_japonica_A8_tRNA-Tyr-GTA-1-1</i>                    | 83.16  | 238.11 | 0.14  | 0.10  | 77.24  | 46.13  | UND  | UND   | 0.18  | UND    |
| <i>Arthrobacter_arilaitensis_Re117_tRNA-Arg-ACG-1-1</i>       | 118.62 | 59.86  | 5.42  | 0.95  | 85.66  | 84.61  | 0.21 | 0.11  | 4.94  | 8.05   |
| <i>Mycobacterium_africanum_GM041182_tRNA-Met-CAT-2-1</i>      | 58.35  | 66.96  | 5.14  | 4.62  | 54.79  | 87.95  | 0.18 | 0.08  | 2.68  | 3.52   |
| <i>Marinomonas_posidonica_IVIA-Po-181_tRNA-fMet-CAT-2-1</i>   | 31.99  | 69.10  | 0.06  | 0.79  | 47.95  | 75.13  | 0.02 | 0.02  | 0.03  | 0.06   |
| <i>Acinetobacter_baumannii_1656-2_tRNA-Ala-TGC-1-1</i>        | 41.43  | 122.47 | 17.63 | 3.14  | 82.37  | 122.84 | 0.29 | 0.40  | 0.40  | 25.93  |
| <i>Azotobacter_chroococcum_NCIMB_8003_tRNA-Gln-TTG-1-1</i>    | 30.59  | 3.88   | 1.37  | 0.68  | 122.77 | 70.02  | 0.14 | 0.20  | 1.75  | 3.39   |
| <i>Propionibacterium_acnes_266_tRNA-Met-CAT-1-1</i>           | 49.27  | 108.00 | 5.93  | 0.87  | 66.82  | 54.93  | 0.22 | 0.16  | 1.56  | 0.07   |
| <i>Acinetobacter_baumannii_1656-2_tRNA-Pro-TGG-1-1</i>        | 76.29  | 35.42  | 5.77  | 2.35  | 120.00 | 64.44  | 0.48 | 0.31  | 1.76  | 3.08   |
| <i>Pseudomonas_fluorescens_A506_tRNA-Ser-TGA-1-1</i>          | 0.22   | 32.09  | 0.07  | 0.06  | 159.29 | 58.65  | 0.23 | 0.07  | UND   | UND    |
| <i>Burkholderia_ambifaria_AMMD_tRNA-fMet-CAT-1-1</i>          | 51.46  | 87.79  | 9.41  | 2.72  | 39.29  | 42.60  | 0.12 | 0.12  | 5.69  | 4.10   |
| <i>Methylophaga_frappieri_JAM7_tRNA-Asp-GTC-2-1</i>           | 90.28  | 74.98  | 1.55  | 1.58  | 26.90  | 83.97  | 0.15 | 0.05  | 0.72  | 0.37   |
| <i>Erwinia_amylovora_ATCC_49946_tRNA-Glu-TTC-1-1</i>          | 36.32  | 149.16 | 5.74  | 1.01  | 40.20  | 65.23  | 0.27 | 0.37  | 6.51  | 34.86  |
| <i>Pseudomonas_chlororaphis_PA23_tRNA-Cys-GCA-1-1</i>         | 52.02  | 36.94  | 1.53  | 0.55  | 137.90 | 58.71  | 0.06 | 0.19  | 0.25  | 0.07   |

|                                                           |        |        |       |      |        |        |      |      |       |        |
|-----------------------------------------------------------|--------|--------|-------|------|--------|--------|------|------|-------|--------|
| Acinetobacter_baumannii_1656-2_tRNA-Leu-TAG-1-1           | 135.20 | 88.41  | 2.46  | 0.40 | 20.59  | 83.38  | 0.27 | UND  | 0.01  | 4.09   |
| Agrobacterium_radiobacter_K84_tRNA-Gly-GCC-1-1            | 67.59  | 121.09 | 3.65  | 1.63 | 38.70  | 25.10  | 0.12 | 0.19 | 3.53  | 4.39   |
| Acinetobacter_baumannii_1656-2_tRNA-Gln-TTG-1-1           | 113.35 | 43.44  | 3.34  | 2.44 | 84.65  | 31.42  | 0.13 | 0.10 | 6.17  | 4.02   |
| Methylobacterium_extorquens_AM1_tRNA-Glu-CTC-1-1          | 9.43   | 215.32 | 6.41  | 0.23 | 40.93  | 42.93  | 0.10 | 0.12 | 5.17  | 385.65 |
| Acetobacter_pasteurianus_386B_tRNA-fMet-CAT-1-1           | 99.83  | 92.87  | 4.26  | 1.37 | 44.01  | 6.34   | 0.28 | 0.19 | 0.94  | 30.38  |
| Acinetobacter_baumannii_1656-2_tRNA-Asn-GTT-2-1           | 71.11  | 55.01  | 17.62 | 3.04 | 79.53  | 29.62  | 0.21 | 0.24 | 9.25  | 11.53  |
| Erwinia_amylovora_ATCC_49946_tRNA-fMet-CAT-2-1            | 26.26  | 25.41  | 2.91  | 1.58 | 84.46  | 57.74  | 0.10 | 0.07 | 0.40  | 1.98   |
| Stenotrophomonas_maltophilia_13637_tRNA-Gln-CTG-1-1       | 251.99 | 45.93  | 0.22  | 0.17 | 17.88  | 21.57  | UND  | 0.25 | 0.06  | 2.44   |
| Pseudomonas_fluorescens_A506_tRNA-Leu-TAA-1-1             | 4.75   | 18.39  | 0.15  | 0.08 | 140.93 | 56.46  | 0.26 | 0.12 | 0.41  | 0.06   |
| Bacteroides_thetaiotaomicron_VPI-5482_tRNA-Thr-TGT-1-1    | 41.39  | 58.99  | 28.38 | 4.59 | 65.49  | 41.11  | 0.42 | 0.19 | 3.64  | 8.54   |
| Collimonas_arenae_Cal35_tRNA-Pro-TGG-1-1                  | 47.85  | 54.20  | 8.37  | 3.12 | 50.94  | 45.30  | 0.08 | 0.18 | 2.65  | 3.25   |
| Pseudoxanthomonas_suwonensis_11-1_tRNA-Ser-CGA-1-1        | 17.85  | 164.90 | 0.05  | 1.84 | 55.28  | 14.72  | UND  | 0.12 | 0.09  | 0.01   |
| Acinetobacter_baumannii_1656-2_tRNA-Ile-GAT-1-1           | 4.18   | 3.29   | 7.30  | 0.60 | 26.74  | 276.52 | 0.15 | 0.15 | 2.74  | 3.95   |
| Bradyrhizobium_diazoeficiens_USDA_110_USDA110_tRNA-Glu    | 24.47  | 22.81  | 0.08  | 0.86 | 108.76 | 142.01 | 0.21 | UND  | 0.06  | 0.11   |
| Aeromonas_hydrophila_4AK4_tRNA-Asp-GTC-1-1                | 24.19  | 71.59  | 16.87 | 3.07 | 61.00  | 13.79  | 0.12 | 0.14 | 11.53 | 26.22  |
| Fusarium_graminearum_CS3005_tRNA-Gly-GCC-1-1              | 12.91  | 104.40 | 2.77  | 0.64 | 36.86  | 128.13 | 0.21 | 0.29 | 0.40  | UND    |
| Acinetobacter_baumannii_1656-2_tRNA-Thr-TGT-1-1           | 98.26  | 59.13  | 6.22  | 2.49 | 37.33  | 48.78  | 0.44 | 0.40 | 4.33  | 45.19  |
| Acidovorax_avenae_subsp_avenae_ATCC_19860_tRNA-Ser-GC     | 82.94  | 39.79  | 6.37  | 5.70 | 36.13  | 104.11 | 0.14 | 0.08 | 0.67  | 24.14  |
| Moraxella_catarrhalis_25239_tRNA-Leu-TAG-1-1              | 123.71 | 105.37 | 2.86  | 1.48 | 62.66  | 38.88  | UND  | 0.08 | 1.00  | 1.52   |
| Actinobacillus_equuli_subsp_equuli_19392_tRNA-Glu-TTC-1-1 | 65.50  | 67.50  | 2.41  | 2.81 | 26.16  | 11.17  | 0.02 | 0.13 | 6.71  | 29.86  |
| Flavobacterium_johnsoniae_UW101_ATCC_17061_tRNA-Ser-T     | 65.04  | 154.73 | 9.18  | 3.44 | 36.52  | 33.75  | 0.32 | UND  | 11.61 | 29.16  |
| Janthinobacterium_agaricidamnosum_NBRC_102515_DSM_962     | 23.94  | 59.16  | 0.11  | 0.34 | 98.93  | 29.57  | UND  | UND  | 5.47  | 88.47  |
| Bradyrhizobium_diazoeficiens_USDA_110_USDA110_tRNA-Glu    | 51.05  | 44.88  | 0.64  | 1.12 | 47.65  | 131.10 | UND  | 0.07 | 0.03  | 0.58   |
| Pseudomonas_alkylphenolia_KL28_tRNA-Trp-CCA-1-1           | 27.94  | 25.93  | 6.18  | UND  | 71.11  | 43.78  | 0.09 | 0.16 | 1.24  | UND    |
| Pseudomonas_aeruginosa_19BR_tRNA-Thr-TGT-1-1              | 27.69  | 50.25  | 0.90  | 0.87 | 47.51  | 50.97  | 0.09 | 0.09 | 0.79  | 3.23   |
| Collimonas_fungivorans_Ter331_tRNA-Gly-GCC-1-1            | 19.43  | 74.52  | 25.89 | 5.69 | 19.27  | 65.72  | 0.08 | 0.22 | 2.13  | 1.60   |
| Buchnera_aphidicola_str_Tuc7_Acyrtosiphon_pisum_tRNA-fMe  | 17.94  | 81.36  | 0.20  | 0.06 | 19.88  | 38.80  | 0.01 | 0.01 | 0.08  | 0.10   |
| Oleispira_antarctica_RB-8_tRNA-fMet-CAT-1-1               | 17.46  | 81.34  | 0.14  | 0.14 | 19.88  | 38.80  | 0.01 | 0.01 | 0.08  | 0.10   |
| Bacillus_clausii_KSM-K16_tRNA-fMet-CAT-1-1                | 17.39  | 81.34  | 0.14  | 0.03 | 19.24  | 37.89  | 0.01 | 0.01 | 0.08  | 0.12   |
| Bdellovibrio_bacteriovorus_109J_tRNA-fMet-CAT-1-1         | 17.40  | 81.37  | 0.16  | 0.03 | 18.72  | 37.89  | 0.01 | 0.01 | 0.08  | 0.13   |
| Candidatus_Portiera_aleyrodidarum_BT-B-HRs_tRNA-Met-CAT-  | 17.39  | 81.34  | 0.14  | 0.03 | 18.69  | 37.97  | 0.01 | 0.01 | 0.08  | 0.12   |
| Bradyrhizobium_diazoeficiens_USDA_110_USDA110_tRNA-Ala    | 25.40  | 62.38  | 0.36  | 0.51 | 78.09  | 108.15 | 0.15 | 0.02 | 0.07  | 0.19   |
| Caenorhabditis_remanei_tRNA-Met-CAT-3-1                   | 32.38  | 49.47  | 23.39 | 1.79 | 26.16  | 39.50  | 0.24 | 0.12 | 1.92  | 7.30   |
| Pseudoxanthomonas_suwonensis_11-1_tRNA-Gly-GCC-1-1        | 139.33 | 71.15  | 0.31  | 1.41 | 65.44  | 8.73   | 0.28 | 0.12 | 1.33  | 0.07   |
| Corynebacterium_atypicum_R2070_tRNA-Arg-ACG-1-1           | 104.74 | 83.77  | 14.16 | 3.20 | 37.35  | 41.93  | 0.10 | UND  | 1.48  | 14.21  |



Table S5. Non-host rDRs (RPM)

| Taxon          | APOB      |           | Bile     |         | HDL       |          | Liver   |         | Urine    |          |
|----------------|-----------|-----------|----------|---------|-----------|----------|---------|---------|----------|----------|
|                | SRBIKO    | WT        | SRBIKO   | WT      | SRBIKO    | WT       | SRBIKO  | WT      | SRBIKO   | WT       |
| Bacteria       | 104478.09 | 114730.23 | 14291.84 | 3421.66 | 115759.51 | 91728.06 | 183.83  | 179.03  | 6799.78  | 24244.83 |
| Eukaryota      | 28441.08  | 24937.70  | 10932.99 | 5757.57 | 26842.12  | 31188.21 | 2449.16 | 3312.43 | 10555.64 | 16042.07 |
| Fungi          | 49869.36  | 34405.14  | 4707.79  | 1006.22 | 41715.80  | 30034.45 | 231.77  | 254.22  | 2355.37  | 5241.13  |
| Protists       | 23129.74  | 33023.18  | 4782.32  | 1215.89 | 18249.65  | 41609.68 | 79.35   | 70.98   | 1821.22  | 2813.75  |
| Archaeplastida | 34829.30  | 16663.40  | 7711.99  | 2775.75 | 17734.88  | 20892.10 | 108.43  | 128.65  | 1268.66  | 3120.96  |
| Embryophyta    | 9430.06   | 6939.73   | 1022.50  | 216.15  | 6597.24   | 6100.84  | 41.54   | 46.83   | 521.24   | 1288.62  |
| Archaea        | 21.59     | 89.19     | 15.87    | 5.46    | 72.70     | 37.15    | 0.14    | 0.20    | 13.44    | 82.41    |

**Table S6. Mean HMB genome counts (RPM).**

| Tissue/Fluid<br>Genotype                             | APOB    |          | Bile   |        | HDL      |          | Liver  |       | Urine  |         |
|------------------------------------------------------|---------|----------|--------|--------|----------|----------|--------|-------|--------|---------|
|                                                      | SRBIKO  | WT       | SRBIKO | WT     | SRBIKO   | WT       | SRBIKO | WT    | SRBIKO | WT      |
| <i>Pseudomonas</i> 2 1 26 uid40037                   | 6857.88 | 7230.43  | 501.42 | 122.62 | 15120.46 | 16703.68 | 11.35  | 12.62 | 246.22 | 800.27  |
| <i>Micrococcus luteus</i> SK58 uid34071              | 9218.81 | 10506.32 | 821.54 | 180.63 | 10096.96 | 6536.87  | 5.85   | 4.09  | 483.87 | 1851.52 |
| <i>Acinetobacter</i> ATCC 27244 uid30949             | 6782.46 | 7926.32  | 878.12 | 215.31 | 7823.02  | 6409.50  | 28.64  | 32.01 | 445.36 | 1172.43 |
| <i>Propionibacterium</i> 409 HC1 uid64685            | 6756.75 | 8603.30  | 735.71 | 179.80 | 7264.35  | 6293.69  | 3.77   | 3.71  | 524.87 | 1865.46 |
| <i>Acinetobacter baumannii</i>                       | 5963.21 | 6577.97  | 713.88 | 176.36 | 7173.29  | 5969.11  | 20.72  | 23.07 | 360.68 | 959.91  |
| <i>Enhydrobacter aerosaccus</i> SK60 uid31335        | 3919.44 | 4040.57  | 384.40 | 86.75  | 4459.11  | 3880.14  | 5.48   | 5.70  | 184.02 | 707.78  |
| <i>Massilia timonae</i> CCUG 45783 uid52185          | 3341.42 | 5274.94  | 735.89 | 168.06 | 4213.81  | 3195.46  | 7.05   | 5.93  | 296.12 | 884.87  |
| <i>Pelomonas</i> sp.                                 | 2117.13 | 2631.60  | 468.28 | 118.16 | 4347.53  | 2156.21  | 4.11   | 3.15  | 185.67 | 1003.14 |
| <i>Plesiomonas shigelloides</i>                      | 538.83  | 1078.63  | 62.42  | 19.75  | 1260.35  | 2062.57  | 1.72   | 1.50  | 33.17  | 76.04   |
| <i>Moraxella catarrhalis</i>                         | 2195.09 | 2233.18  | 241.63 | 53.91  | 2549.17  | 2054.93  | 7.20   | 8.02  | 139.96 | 435.16  |
| <i>Aeromonas</i> sp.                                 | 841.10  | 765.62   | 101.73 | 21.51  | 1380.05  | 1933.28  | 1.48   | 1.71  | 39.34  | 48.56   |
| <i>Psychrobacter</i> 1501 2011 uid65121              | 1574.10 | 1518.02  | 215.57 | 58.45  | 1779.47  | 1644.02  | 4.79   | 5.34  | 97.96  | 304.58  |
| <i>Desulfovibrio</i> 3 1 syn3 uid42529               | 181.79  | 146.13   | 89.15  | 31.71  | 422.27   | 1228.60  | 0.90   | 0.82  | 18.69  | 33.21   |
| <i>Faecalibacterium prausnitzii</i> M21 2 uid18203   | 581.60  | 2090.80  | 81.69  | 20.19  | 598.97   | 1205.08  | 0.37   | 0.72  | 16.38  | 19.14   |
| <i>Bilophila</i> 4 1 30 uid41961                     | 244.83  | 314.34   | 155.07 | 49.17  | 389.01   | 1135.94  | 16.70  | 22.51 | 13.37  | 21.08   |
| <i>Ralstonia</i> 5 2 56FAA uid39391                  | 778.97  | 648.97   | 149.56 | 43.77  | 1041.40  | 1023.25  | 1.77   | 1.41  | 61.83  | 130.77  |
| <i>Listeria innocua</i> ATCC 33091 uid65129          | 653.08  | 2008.88  | 21.91  | 8.19   | 556.80   | 991.41   | 0.32   | 0.42  | 10.69  | 14.98   |
| <i>Anaerostipes</i> 3 2 56FAA uid39999               | 472.59  | 1946.91  | 17.67  | 9.89   | 486.55   | 985.15   | 0.26   | 0.29  | 16.55  | 12.25   |
| <i>Porphyromonas asaccharolytica</i> PR426713P I uid | 107.89  | 98.99    | 48.77  | 12.42  | 471.03   | 823.65   | 0.58   | 0.42  | 8.07   | 12.10   |
| <i>Afipia broomeae</i> ATCC 49717 uid52155           | 724.93  | 935.07   | 114.09 | 32.33  | 801.40   | 798.12   | 1.71   | 1.92  | 74.80  | 194.12  |
| <i>Oxalobacter formigenes</i> OXCC13 uid32499        | 539.45  | 703.07   | 147.52 | 34.07  | 2058.70  | 745.03   | 1.55   | 1.48  | 40.40  | 84.08   |
| <i>Sphingobium yanoikuyae</i> ATCC 51230 uid52201    | 602.40  | 743.90   | 108.21 | 24.55  | 729.44   | 694.74   | 3.10   | 3.00  | 62.30  | 141.78  |
| Enterobacteriaceae bacterium 9 2 54FAA uid4197       | 390.50  | 398.47   | 47.66  | 14.20  | 513.32   | 673.23   | 1.11   | 1.25  | 25.25  | 131.29  |
| <i>Proteus mirabilis</i> ATCC 29906 uid31523         | 346.15  | 502.28   | 32.60  | 9.99   | 530.84   | 672.96   | 0.84   | 0.87  | 12.62  | 54.15   |
| <i>Enterobacter cancerogenus</i> ATCC 35316 uid2866  | 398.65  | 505.20   | 64.06  | 16.12  | 556.74   | 661.65   | 1.97   | 2.32  | 43.71  | 104.13  |
| <i>Sphingomonas</i> sp.                              | 730.76  | 659.58   | 122.12 | 27.45  | 798.82   | 660.73   | 2.72   | 2.26  | 59.16  | 101.06  |
| <i>Catenibacterium mitsuokai</i> DSM 15897 uid19923  | 422.77  | 1090.11  | 15.59  | 6.82   | 553.52   | 657.12   | 0.45   | 0.45  | 27.43  | 12.00   |
| <i>Oligella urethralis</i>                           | 875.65  | 1123.23  | 202.71 | 51.47  | 1023.37  | 654.82   | 0.97   | 0.60  | 79.01  | 264.72  |
| <i>Brevundimonas diminuta</i> 470 4 uid67195         | 2482.32 | 2142.71  | 97.79  | 25.12  | 822.09   | 637.94   | 2.47   | 2.58  | 44.16  | 56.49   |
| <i>Achromobacter piechaudii</i> ATCC 43553 uid46343  | 1015.63 | 557.09   | 201.70 | 37.84  | 925.84   | 625.33   | 1.51   | 1.28  | 65.46  | 321.57  |
| <i>Cardiobacterium hominis</i> ATCC 15826 uid37269   | 470.06  | 525.20   | 35.27  | 15.50  | 644.09   | 610.77   | 1.03   | 1.07  | 22.07  | 35.42   |

|                                                |        |         |        |       |        |        |      |      |       |        |
|------------------------------------------------|--------|---------|--------|-------|--------|--------|------|------|-------|--------|
| Rhizobium sp.                                  | 982.38 | 1178.60 | 56.53  | 21.19 | 823.91 | 603.03 | 2.06 | 1.94 | 51.10 | 124.46 |
| Kocuria sp.                                    | 630.63 | 615.03  | 43.87  | 17.51 | 904.07 | 562.60 | 0.49 | 0.46 | 38.03 | 74.67  |
| Arthrobacter sp.                               | 646.33 | 448.00  | 54.96  | 22.17 | 616.61 | 554.35 | 0.75 | 0.58 | 39.76 | 79.12  |
| Citrobacter 30 2 uid32453                      | 396.75 | 363.88  | 46.12  | 12.93 | 470.23 | 540.03 | 1.22 | 1.41 | 34.21 | 70.34  |
| Synergistes 3 1 syn1 uid39419                  | 86.52  | 73.84   | 41.38  | 11.79 | 184.57 | 539.53 | 0.40 | 0.61 | 5.75  | 11.16  |
| Morganella morganii                            | 295.71 | 289.64  | 45.10  | 11.88 | 445.83 | 522.60 | 0.98 | 0.99 | 18.32 | 61.22  |
| Bacteroides vulgatus CL09T03C04 uid64837       | 394.63 | 524.29  | 135.18 | 23.47 | 469.45 | 519.39 | 0.66 | 0.74 | 27.02 | 31.88  |
| Edwardsiella tarda ATCC 23685 uid28661         | 313.96 | 304.79  | 69.72  | 16.23 | 492.38 | 518.47 | 1.19 | 1.44 | 26.91 | 58.96  |
| Salmonella enterica                            | 368.13 | 336.42  | 53.63  | 15.71 | 459.56 | 512.00 | 1.44 | 1.43 | 31.94 | 90.15  |
| Raoultella ornithinolytica                     | 310.39 | 325.82  | 45.73  | 13.77 | 450.26 | 508.36 | 1.18 | 1.44 | 26.40 | 76.54  |
| Klebsiella pneumoniae rhinoscleromatis ATCC 13 | 313.89 | 314.69  | 46.85  | 12.90 | 430.68 | 495.49 | 1.34 | 1.30 | 25.74 | 81.79  |
| Cedecea neteri                                 | 313.15 | 322.28  | 44.91  | 13.82 | 410.47 | 494.38 | 1.28 | 1.39 | 22.62 | 96.70  |
| Serratia odorifera DSM 4582 uid40087           | 293.11 | 242.01  | 35.05  | 12.62 | 402.69 | 489.50 | 1.04 | 1.06 | 22.37 | 50.56  |
| Escherichia 1 1 43 uid32463                    | 434.19 | 365.54  | 62.09  | 17.24 | 454.54 | 481.26 | 2.00 | 1.89 | 32.77 | 90.10  |
| Providencia stuartii ATCC 25827 uid20553       | 237.69 | 248.46  | 38.49  | 10.96 | 406.71 | 478.52 | 0.73 | 0.83 | 15.65 | 50.48  |
| Shigella                                       | 363.16 | 350.27  | 55.25  | 16.37 | 419.66 | 476.67 | 1.73 | 1.96 | 31.30 | 97.18  |
| Dermacoccus Ellin185 uid34079                  | 566.60 | 532.86  | 56.45  | 19.99 | 550.25 | 469.09 | 0.70 | 0.73 | 41.82 | 173.50 |
| Lautropia mirabilis ATCC 51599 uid52989        | 445.91 | 509.06  | 91.23  | 22.05 | 664.29 | 456.38 | 1.04 | 1.07 | 26.10 | 89.53  |
| Methylobacterium sp.                           | 571.96 | 932.88  | 100.78 | 25.71 | 514.98 | 455.48 | 1.46 | 1.68 | 23.60 | 55.27  |
| Kluyvera intermedia                            | 309.86 | 403.90  | 42.78  | 12.80 | 444.28 | 444.76 | 1.31 | 1.25 | 27.91 | 75.42  |
| Rhodococcus erythropolis SK121 uid34067        | 502.82 | 475.99  | 60.37  | 15.92 | 371.60 | 441.55 | 0.90 | 0.79 | 37.16 | 130.73 |
| Lactobacillus 7 1 47FAA uid40031               | 346.49 | 395.41  | 21.47  | 5.20  | 293.09 | 439.50 | 0.33 | 0.30 | 10.62 | 17.13  |
| Corynebacterium accolens ATCC 49725 uid31443   | 651.67 | 722.84  | 53.44  | 19.72 | 585.79 | 426.45 | 0.57 | 0.70 | 33.63 | 111.56 |
| Staphylococcus epidermidis 14 1 R1 SE uid64683 | 455.32 | 426.75  | 79.89  | 16.71 | 488.70 | 408.93 | 0.88 | 0.54 | 56.66 | 127.24 |
| Pseudoramibacter alactolyticus ATCC 23263 uid5 | 398.65 | 602.08  | 32.61  | 10.01 | 501.17 | 403.99 | 0.27 | 0.35 | 23.02 | 98.19  |
| Prevotella C561 uid41971                       | 163.74 | 165.74  | 68.99  | 15.03 | 224.27 | 401.90 | 0.64 | 0.52 | 5.81  | 19.06  |
| Ruminococcus 5 1 39BFAA uid32503               | 386.70 | 606.62  | 92.32  | 37.46 | 466.90 | 398.99 | 0.74 | 0.58 | 36.13 | 132.30 |
| Dietzia cinnamea                               | 489.54 | 476.70  | 57.42  | 15.27 | 342.85 | 387.44 | 0.71 | 0.58 | 27.75 | 25.59  |
| Microbacterium ginsengisoli                    | 493.18 | 658.63  | 91.83  | 19.54 | 524.29 | 369.24 | 0.85 | 0.79 | 30.08 | 81.12  |
| Neisseria GT4A CT1 uid40033                    | 238.57 | 360.01  | 56.37  | 16.39 | 335.69 | 364.85 | 0.78 | 0.95 | 19.80 | 58.13  |
| Pasteurella dagmatis ATCC 43325 uid40085       | 150.46 | 156.54  | 27.14  | 8.50  | 272.78 | 360.25 | 0.66 | 0.77 | 41.89 | 117.38 |
| Haemophilus oral taxon 851 F0397 uid48495      | 208.45 | 168.12  | 29.95  | 8.44  | 335.50 | 355.47 | 0.77 | 0.85 | 41.84 | 112.99 |
| Mycobacterium parascrofulaceum ATCC BAA 614    | 310.49 | 244.70  | 58.40  | 16.27 | 214.25 | 342.54 | 0.64 | 0.44 | 19.19 | 30.56  |
| Rothia dentocariosa                            | 449.95 | 445.25  | 53.25  | 15.54 | 567.77 | 338.92 | 0.48 | 0.25 | 17.61 | 162.00 |
| Aggregatibacter actinomycetemcomitans Y4 uid67 | 202.77 | 174.74  | 29.19  | 9.73  | 281.61 | 327.40 | 0.56 | 0.72 | 13.52 | 50.83  |

|                                              |        |        |        |       |        |        |       |       |       |        |
|----------------------------------------------|--------|--------|--------|-------|--------|--------|-------|-------|-------|--------|
| Coprobacillus D7 uid32495                    | 253.40 | 299.47 | 26.59  | 5.29  | 228.54 | 323.60 | 0.29  | 0.27  | 5.57  | 5.76   |
| Leifsonia sp.                                | 497.15 | 416.55 | 63.46  | 21.56 | 495.55 | 322.24 | 0.73  | 0.68  | 23.86 | 77.36  |
| Eikenella corrodens ATCC 23834 uid30493      | 225.66 | 310.04 | 44.93  | 14.54 | 344.31 | 322.00 | 0.63  | 0.79  | 19.67 | 68.80  |
| Roseomonas cervicalis ATCC 49957 uid31527    | 439.53 | 531.31 | 56.12  | 13.07 | 365.28 | 317.41 | 0.86  | 0.95  | 20.92 | 94.65  |
| Streptococcus 2 1 36FAA uid37947             | 469.28 | 407.18 | 60.37  | 13.50 | 465.07 | 314.42 | 0.41  | 0.43  | 25.93 | 103.10 |
| Staphylococcus aureus ATCC 51811 uid48445    | 310.83 | 313.03 | 49.77  | 10.90 | 308.92 | 314.16 | 0.48  | 0.29  | 17.42 | 64.73  |
| Oscillibacter sp.                            | 164.76 | 118.08 | 74.09  | 12.86 | 165.15 | 312.75 | 0.64  | 0.96  | 41.42 | 16.47  |
| Kytococcus sedentarius                       | 670.50 | 303.32 | 41.33  | 11.37 | 389.11 | 311.24 | 0.56  | 0.43  | 20.70 | 41.41  |
| Simonsiella muelleri ATCC 29453 uid41981     | 248.65 | 231.30 | 46.59  | 15.98 | 287.67 | 309.93 | 0.67  | 1.18  | 22.17 | 63.63  |
| Kingella denitrificans ATCC 33394 uid53051   | 221.95 | 241.72 | 44.33  | 13.78 | 312.50 | 304.51 | 0.77  | 1.09  | 27.12 | 70.98  |
| Pediococcus acidilactici 7 4 uid40051        | 220.78 | 296.20 | 17.14  | 5.13  | 232.85 | 304.31 | 0.23  | 0.27  | 7.68  | 9.90   |
| Brachybacterium faecium                      | 305.74 | 315.54 | 55.05  | 12.57 | 321.40 | 300.22 | 0.40  | 0.69  | 21.42 | 53.76  |
| Sutterella parvirubra YIT 11816 uid48499     | 261.75 | 252.91 | 55.32  | 14.06 | 356.73 | 299.70 | 0.60  | 0.69  | 15.20 | 141.88 |
| Cyanobacterium stanieri                      | 376.87 | 261.86 | 69.91  | 36.84 | 290.84 | 296.89 | 0.94  | 0.72  | 28.50 | 89.80  |
| Actinobacillus ureae ATCC 25976 uid52977     | 171.01 | 211.20 | 32.61  | 8.96  | 259.13 | 296.66 | 0.75  | 0.76  | 12.78 | 60.77  |
| Coprococcus comes ATCC 27758 uid20525        | 212.87 | 333.72 | 14.57  | 7.30  | 242.29 | 296.43 | 0.18  | 0.18  | 10.49 | 16.08  |
| Yokenella regensburgei ATCC 43003 uid65133   | 142.00 | 178.07 | 20.25  | 6.18  | 216.08 | 286.04 | 0.59  | 0.52  | 10.43 | 41.94  |
| Burkholderiales bacterium 1 1 47 uid41965    | 241.12 | 250.14 | 60.33  | 14.86 | 389.03 | 274.85 | 0.55  | 0.49  | 15.19 | 159.17 |
| Oribacterium ACB1 uid49877                   | 175.34 | 243.45 | 9.60   | 3.90  | 194.12 | 266.73 | 0.15  | 0.13  | 15.33 | 5.27   |
| Succinatimonas hippei YIT 12066 uid48507     | 211.63 | 245.30 | 23.13  | 6.61  | 303.48 | 263.46 | 0.34  | 0.38  | 11.94 | 25.21  |
| Dermabacter hominis                          | 326.18 | 327.86 | 29.72  | 9.01  | 362.29 | 257.67 | 0.46  | 0.31  | 27.18 | 35.01  |
| Myroides odoratimimus CIP 103059 uid52197    | 245.63 | 279.61 | 70.70  | 19.40 | 265.97 | 239.53 | 0.70  | 0.43  | 17.84 | 92.33  |
| Arcobacter butzleri JV22 uid53195            | 178.61 | 221.68 | 53.17  | 13.41 | 173.04 | 235.08 | 0.37  | 0.23  | 5.56  | 76.14  |
| Bacillus 2 A 57 CT2 uid40003                 | 264.21 | 228.02 | 28.25  | 11.76 | 226.87 | 216.78 | 0.31  | 0.29  | 15.97 | 24.76  |
| Holdemania filiformis DSM 12042 uid30361     | 45.48  | 58.73  | 11.09  | 4.01  | 156.79 | 211.67 | 0.19  | 0.13  | 3.21  | 48.20  |
| Anaerobaculum hydrogeniformans ATCC BAA 18   | 88.88  | 83.80  | 257.99 | 96.45 | 146.73 | 209.65 | 59.93 | 54.24 | 45.95 | 49.80  |
| Aeromicrobium marinum DSM 15272 uid34545     | 223.49 | 304.39 | 36.11  | 11.06 | 275.35 | 209.38 | 0.69  | 0.45  | 28.68 | 39.51  |
| Enterococcus faecalis ATCC 29200 uid31459    | 261.74 | 235.08 | 24.80  | 9.61  | 164.61 | 207.46 | 0.34  | 0.40  | 13.21 | 11.86  |
| Subdoligranulum variabile DSM 15176 uid18181 | 141.03 | 155.59 | 40.47  | 10.96 | 190.85 | 201.79 | 0.35  | 0.37  | 22.97 | 61.70  |
| Olsenella oral taxon 809 F0356 uid39743      | 36.45  | 26.37  | 14.22  | 4.36  | 131.23 | 189.73 | 0.17  | 0.15  | 3.66  | 5.39   |
| Hafnia alvei ATCC 51873 uid65123             | 126.69 | 135.12 | 13.93  | 4.83  | 177.61 | 186.90 | 0.33  | 0.43  | 7.40  | 17.30  |
| Propionimicrobium lymphophilum               | 197.66 | 150.58 | 19.60  | 8.04  | 217.58 | 184.11 | 0.19  | 0.25  | 11.18 | 9.06   |
| Actinomyces oral taxon 170 F0386 uid48493    | 270.27 | 203.96 | 27.01  | 8.78  | 244.06 | 183.40 | 0.43  | 0.26  | 14.83 | 172.59 |
| Bergeyella zoohelcum ATCC 43767 uid52163     | 116.28 | 195.52 | 43.82  | 9.21  | 195.84 | 177.71 | 0.79  | 0.50  | 9.99  | 15.40  |
| Chryseobacterium gleum ATCC 35910 uid30953   | 210.38 | 187.94 | 47.64  | 10.12 | 266.47 | 168.58 | 0.94  | 1.05  | 13.35 | 43.99  |

|                                                       |        |        |       |       |        |        |      |      |       |       |
|-------------------------------------------------------|--------|--------|-------|-------|--------|--------|------|------|-------|-------|
| <i>Brevibacterium mcbrellneri</i> ATCC 49030 uid34583 | 177.30 | 165.84 | 32.85 | 6.64  | 252.31 | 156.90 | 0.27 | 0.34 | 13.33 | 43.37 |
| <i>Sphingobacterium spiritivorum</i> ATCC 33300 uid31 | 143.82 | 63.80  | 29.97 | 11.48 | 81.31  | 155.15 | 0.34 | 0.57 | 8.06  | 14.77 |
| <i>Atopobium rimae</i> ATCC 49626 uid30999            | 29.20  | 108.78 | 19.10 | 4.17  | 164.21 | 155.02 | 0.20 | 0.17 | 3.62  | 8.26  |
| <i>Turicella otitidis</i> ATCC 51513 uid52203         | 280.34 | 172.02 | 40.35 | 7.06  | 179.54 | 153.55 | 0.29 | 0.30 | 10.09 | 12.30 |
| <i>Capnocytophaga gingivalis</i> ATCC 33624 uid3138   | 164.53 | 146.20 | 31.26 | 8.52  | 218.75 | 151.45 | 0.34 | 0.50 | 13.71 | 28.69 |
| <i>Helicobacter pylori</i>                            | 39.54  | 72.21  | 30.93 | 6.66  | 108.48 | 146.64 | 0.16 | 0.24 | 4.20  | 4.69  |
| <i>Megamonas funiformis</i> YIT 11815 uid46421        | 77.83  | 130.74 | 23.10 | 6.79  | 66.46  | 145.94 | 0.19 | 0.20 | 12.66 | 8.02  |
| <i>Granulicatella adiacens</i> ATCC 49175 uid37271    | 89.30  | 170.92 | 16.88 | 5.72  | 148.40 | 143.99 | 0.17 | 0.20 | 13.73 | 20.37 |
| <i>Flavobacteria bacterium</i>                        | 162.67 | 139.49 | 32.68 | 6.83  | 142.53 | 143.29 | 0.39 | 0.53 | 5.52  | 51.62 |
| <i>Segniliparus rugosus</i> ATCC BAA 974 uid40685     | 175.81 | 128.13 | 20.93 | 9.19  | 151.57 | 137.91 | 0.30 | 0.22 | 9.17  | 18.53 |
| <i>Desulfitobacterium hafniense</i> DP7 uid30023      | 160.21 | 141.34 | 18.20 | 6.21  | 168.81 | 134.49 | 0.23 | 0.21 | 6.44  | 9.20  |
| <i>Anaerotruncus colihominis</i> DSM 17241 uid19659   | 71.89  | 102.51 | 26.22 | 6.21  | 93.72  | 131.27 | 0.15 | 0.16 | 10.73 | 7.86  |
| <i>Dorea formicigenerans</i> 4 6 53AFAA uid46407      | 115.76 | 55.10  | 34.09 | 9.29  | 100.77 | 128.70 | 0.51 | 0.38 | 10.16 | 13.77 |
| <i>Gemella haemolysans</i> ATCC 10379 uid30487        | 202.59 | 96.48  | 27.49 | 5.79  | 143.32 | 126.01 | 0.29 | 0.23 | 6.21  | 12.94 |
| <i>Trueperella pyogenes</i>                           | 135.39 | 124.67 | 24.27 | 8.06  | 151.90 | 121.05 | 0.36 | 0.23 | 12.28 | 16.91 |
| <i>Clostridiales bacterium 1 7 47FAA</i> uid30067     | 104.40 | 99.44  | 47.64 | 30.44 | 107.41 | 117.99 | 1.29 | 1.79 | 24.46 | 40.94 |
| <i>Flavonifractor plautii</i> ATCC 29863 uid18189     | 163.73 | 71.31  | 30.87 | 5.85  | 57.80  | 117.73 | 0.11 | 0.26 | 31.45 | 12.68 |
| <i>Aneurinibacillus migulanus?</i>                    | 93.63  | 134.74 | 19.08 | 5.42  | 121.63 | 117.32 | 0.15 | 0.12 | 8.16  | 7.35  |
| <i>Arcanobacterium</i> sp.                            | 155.69 | 249.78 | 39.54 | 6.20  | 150.26 | 115.63 | 0.23 | 0.13 | 13.72 | 44.62 |
| <i>Phascolarctobacterium succinatutens</i> YIT 12067  | 52.89  | 26.12  | 11.12 | 3.59  | 58.00  | 112.42 | 0.09 | 0.10 | 2.78  | 10.84 |
| <i>Desmospora</i> 8437 uid64725                       | 228.51 | 155.68 | 18.46 | 8.43  | 138.65 | 111.05 | 0.09 | 0.17 | 5.18  | 7.32  |
| <i>Paraprevotella clara</i> YIT 11840 uid48501        | 94.23  | 139.00 | 48.75 | 9.60  | 133.66 | 109.04 | 0.27 | 0.18 | 9.91  | 29.33 |
| <i>Treponema denticola</i> AL 2 uid64903              | 40.13  | 14.62  | 8.67  | 3.11  | 54.32  | 106.53 | 0.09 | 0.13 | 3.42  | 2.11  |
| <i>Fingoldia magna</i> ACS 171 V Col3 uid49435        | 58.54  | 169.12 | 20.30 | 5.41  | 180.12 | 106.10 | 0.18 | 0.26 | 9.03  | 6.71  |
| <i>Blautia hansenii</i> DSM 20583 uid30021            | 113.15 | 75.70  | 35.36 | 7.59  | 136.99 | 105.27 | 0.35 | 0.29 | 13.11 | 91.43 |
| <i>Akkermansia muciniphila</i>                        | 100.15 | 57.21  | 29.47 | 7.48  | 138.74 | 105.18 | 0.17 | 0.21 | 2.00  | 7.10  |
| <i>Alistipes</i> HGB5 uid54031                        | 62.67  | 48.54  | 14.11 | 4.87  | 74.60  | 104.80 | 0.22 | 0.14 | 6.44  | 6.74  |
| <i>Actinobaculum massiliae</i> ACS 171 V Col2 uid520  | 118.84 | 191.36 | 24.62 | 6.71  | 158.82 | 104.66 | 0.27 | 0.15 | 15.73 | 53.62 |
| <i>Bifidobacterium</i> 12 1 47BFAA uid41959           | 116.84 | 256.68 | 14.64 | 12.26 | 121.32 | 103.78 | 0.18 | 0.20 | 6.94  | 5.62  |
| <i>Veillonella</i> 3 1 44 uid41975                    | 80.80  | 105.46 | 20.37 | 4.21  | 70.56  | 103.55 | 0.19 | 0.12 | 7.63  | 8.74  |
| <i>Alloscardovia omnicolens</i>                       | 49.04  | 112.52 | 18.14 | 7.38  | 57.51  | 101.49 | 0.22 | 0.16 | 5.66  | 8.16  |
| <i>Abiotrophia defectiva</i>                          | 75.87  | 102.78 | 18.91 | 6.46  | 116.83 | 100.11 | 0.22 | 0.11 | 9.48  | 10.13 |
| <i>Parabacteroides</i> D13 uid38359                   | 46.57  | 62.08  | 15.61 | 6.24  | 73.17  | 98.32  | 0.13 | 0.23 | 2.22  | 7.49  |
| <i>Roseburia intestinalis</i> L1 82 uid30005          | 119.26 | 167.75 | 19.23 | 8.61  | 100.07 | 97.71  | 0.15 | 0.15 | 14.90 | 61.25 |
| <i>Campylobacter</i> 10 1 50 uid40015                 | 79.15  | 61.72  | 23.19 | 5.23  | 70.06  | 97.45  | 0.26 | 0.23 | 5.63  | 10.36 |

|                                                        |        |        |       |      |        |       |      |      |       |        |
|--------------------------------------------------------|--------|--------|-------|------|--------|-------|------|------|-------|--------|
| <i>Sporosarcina newyorkensis</i> uid64749              | 215.66 | 88.37  | 16.48 | 7.38 | 78.80  | 96.62 | 0.20 | 0.29 | 10.41 | 51.31  |
| <i>Erysipelothrix rhusiopathiae</i> ATCC 19414 uid3146 | 58.88  | 67.41  | 8.93  | 2.65 | 142.18 | 94.89 | 0.14 | 0.16 | 1.78  | 4.70   |
| <i>Weissella paramesenteroides</i> ATCC 33313 uid341   | 49.63  | 282.88 | 25.68 | 5.47 | 83.42  | 93.48 | 0.14 | 0.23 | 3.85  | 11.77  |
| <i>Aerococcus urinae</i>                               | 61.82  | 134.24 | 28.78 | 7.08 | 71.93  | 91.11 | 0.06 | 0.15 | 5.15  | 6.82   |
| <i>Anaerofustis stercorihominis</i> DSM 17244 uid1965  | 44.69  | 30.82  | 11.47 | 3.03 | 56.46  | 88.33 | 0.15 | 0.16 | 6.21  | 3.61   |
| <i>Tissierellia bacterium</i>                          | 79.27  | 69.99  | 18.42 | 5.44 | 116.40 | 87.61 | 0.11 | 0.10 | 12.12 | 10.01  |
| <i>Leuconostoc mesenteroides cremoris</i> ATCC 1925    | 99.81  | 30.47  | 23.02 | 3.63 | 61.39  | 85.76 | 0.18 | 0.24 | 4.93  | 13.49  |
| <i>Weeksella virosa</i>                                | 98.13  | 100.54 | 14.54 | 3.43 | 89.57  | 85.30 | 0.27 | 0.23 | 8.10  | 10.37  |
| <i>Pseudoflavonifractor capillosus</i> ATCC 29799 uid1 | 118.41 | 66.42  | 16.81 | 6.32 | 69.05  | 82.16 | 0.16 | 0.07 | 8.31  | 9.97   |
| Ruminococcaceae bacterium D16 uid42541                 | 75.84  | 51.66  | 9.75  | 4.91 | 54.44  | 80.80 | 0.08 | 0.09 | 5.81  | 7.39   |
| Lachnospiraceae bacterium 1 1 57FAA uid39377           | 63.27  | 77.20  | 26.29 | 8.72 | 76.67  | 79.80 | 0.20 | 0.10 | 23.15 | 14.59  |
| <i>Johnsonella ignava</i> ATCC 51276 uid40693          | 74.36  | 68.34  | 12.43 | 3.16 | 73.88  | 79.73 | 0.10 | 0.08 | 7.00  | 9.77   |
| <i>Butyricoccus pullicaecorum</i>                      | 68.19  | 47.82  | 10.10 | 4.78 | 51.56  | 78.47 | 0.10 | 0.06 | 10.23 | 9.54   |
| <i>Clostridium</i> 7 2 43FAA uid32457                  | 103.28 | 91.49  | 20.83 | 7.54 | 78.37  | 78.05 | 0.17 | 0.32 | 8.05  | 15.65  |
| <i>Facklamia hominis</i>                               | 60.58  | 72.82  | 11.72 | 5.31 | 74.93  | 74.63 | 0.14 | 0.16 | 4.76  | 10.57  |
| <i>Mitsuokella multacida</i> DSM 20544 uid28653        | 45.80  | 112.67 | 16.87 | 4.82 | 118.14 | 72.86 | 0.12 | 0.16 | 5.17  | 7.37   |
| <i>Odoribacter laneus</i> YIT 12061 uid46423           | 55.38  | 48.62  | 20.31 | 6.93 | 61.75  | 71.59 | 2.69 | 2.92 | 3.30  | 24.91  |
| <i>Dolosigranulum pigrum</i> ATCC 51524 uid52171       | 55.00  | 97.13  | 12.09 | 4.58 | 116.63 | 70.86 | 0.22 | 0.17 | 7.47  | 143.93 |
| <i>Shuttleworthia satelles</i> DSM 14600 uid33169      | 65.14  | 23.91  | 13.50 | 5.62 | 56.04  | 70.79 | 0.11 | 0.11 | 5.60  | 7.64   |
| <i>Catabacter hongkongensis</i>                        | 55.62  | 37.73  | 8.68  | 4.40 | 48.13  | 70.74 | 0.09 | 0.06 | 5.47  | 2.93   |
| <i>Butyrivibrio crossotus</i> DSM 2876 uid28999        | 64.73  | 65.75  | 22.71 | 5.63 | 96.27  | 70.68 | 0.18 | 0.19 | 13.61 | 9.91   |
| <i>Selenomonas F0473</i> uid64897                      | 33.27  | 41.21  | 8.53  | 2.72 | 68.90  | 70.19 | 0.07 | 0.09 | 3.98  | 8.24   |
| <i>Eubacterium</i> 3 1 31 uid39375                     | 58.23  | 83.69  | 5.38  | 2.70 | 88.56  | 66.88 | 0.11 | 0.28 | 2.41  | 44.83  |
| <i>Anaeroglobus geminatus</i> F0357 uid50397           | 35.13  | 16.83  | 9.59  | 2.58 | 53.19  | 66.74 | 0.08 | 0.08 | 2.99  | 7.52   |
| <i>Gardnerella vaginalis</i>                           | 59.47  | 151.07 | 10.17 | 5.02 | 56.43  | 65.82 | 0.12 | 0.10 | 7.76  | 7.00   |
| <i>Dysgonomonas mossii</i> DSM 22836 uid46411          | 40.50  | 40.14  | 13.34 | 2.92 | 64.04  | 64.65 | 0.16 | 0.09 | 1.70  | 5.49   |
| <i>Peptoniphilus oral</i> taxon 836 F0141 uid49437     | 34.93  | 19.26  | 14.21 | 3.04 | 33.35  | 64.38 | 0.12 | 0.09 | 2.70  | 4.32   |
| <i>Parascardovia denticolen</i>                        | 59.84  | 88.24  | 9.04  | 5.11 | 59.04  | 63.61 | 0.10 | 0.08 | 4.07  | 4.15   |
| <i>Eggerthella</i> 1 3 56FAA uid40023                  | 67.86  | 48.73  | 18.27 | 4.47 | 43.18  | 60.99 | 0.29 | 0.15 | 3.48  | 3.42   |
| <i>Mobiluncus curtisii</i> ATCC 35241 uid34631         | 100.56 | 161.69 | 21.77 | 5.25 | 75.42  | 59.76 | 0.19 | 0.14 | 4.50  | 6.65   |
| <i>Dialister invisus</i> DSM 15470 uid33143            | 44.75  | 55.61  | 13.91 | 4.07 | 43.82  | 59.48 | 0.11 | 0.06 | 3.47  | 6.40   |
| <i>Lachnoanaerobaculum</i> sp.                         | 74.58  | 48.70  | 11.32 | 4.96 | 57.08  | 59.44 | 0.13 | 0.08 | 6.39  | 8.13   |
| Erysipelotrichaceae bacterium 21 3 uid39369            | 59.27  | 86.09  | 6.01  | 2.81 | 65.91  | 59.39 | 0.15 | 0.14 | 8.32  | 43.52  |
| <i>Fusobacterium periodonticum</i>                     | 57.73  | 51.40  | 5.44  | 2.97 | 55.94  | 59.03 | 0.08 | 0.10 | 4.52  | 6.37   |
| <i>Barnesiella intestinihominis</i> YIT 11860 uid46375 | 41.74  | 66.86  | 11.39 | 3.26 | 93.23  | 58.95 | 0.14 | 0.14 | 3.34  | 16.74  |

|                                                  |        |        |       |       |        |       |      |      |       |       |
|--------------------------------------------------|--------|--------|-------|-------|--------|-------|------|------|-------|-------|
| Megasphaera UPII 135 E uid64691                  | 51.21  | 24.13  | 6.78  | 4.42  | 62.26  | 58.59 | 0.11 | 0.13 | 3.08  | 6.10  |
| Streptomyces sp.                                 | 34.29  | 51.04  | 6.33  | 4.48  | 53.54  | 58.32 | 0.12 | 0.13 | 1.61  | 39.03 |
| Eremococcus coleocola ACS 139 V Col8 uid5402     | 71.07  | 55.90  | 8.06  | 5.17  | 101.23 | 57.97 | 0.09 | 0.12 | 4.96  | 8.09  |
| Stomatobaculum longum uid49875                   | 36.66  | 40.90  | 7.92  | 4.05  | 42.09  | 51.39 | 0.08 | 0.06 | 24.48 | 3.82  |
| Bacteroidetes oral taxon 274 F0058 uid41957      | 45.52  | 29.48  | 10.87 | 2.90  | 45.32  | 50.14 | 0.12 | 0.10 | 8.35  | 17.03 |
| Cetobacterium somerae                            | 56.03  | 67.15  | 4.61  | 3.61  | 69.16  | 50.07 | 0.07 | 0.13 | 2.07  | 5.97  |
| Marvinbryantia formatexigens DSM 14469 uid210    | 75.76  | 48.42  | 16.98 | 6.30  | 74.26  | 49.70 | 0.15 | 0.09 | 10.44 | 16.12 |
| Anaerococcus hydrogenalis ACS 025 V Sch4 uid5    | 70.95  | 57.84  | 16.97 | 7.86  | 109.42 | 48.00 | 0.19 | 0.09 | 8.70  | 16.54 |
| Acidaminococcus D21 uid34117                     | 35.61  | 28.46  | 5.47  | 3.32  | 46.34  | 47.77 | 0.09 | 0.07 | 2.59  | 7.26  |
| Paenibacillus HGF5 uid54029                      | 44.89  | 38.37  | 10.99 | 3.38  | 41.72  | 46.80 | 0.44 | 0.17 | 2.46  | 8.98  |
| Helcococcus kunzii ATCC 51366 uid52183           | 26.91  | 33.76  | 6.60  | 2.41  | 41.06  | 46.66 | 0.06 | 0.13 | 2.36  | 2.23  |
| Tannerella 6 1 58FAA CT1 uid40043                | 58.81  | 42.92  | 17.20 | 5.00  | 54.96  | 45.71 | 0.17 | 0.15 | 8.37  | 34.76 |
| Gordonibacter pamelaee                           | 49.02  | 59.20  | 12.26 | 4.00  | 39.92  | 45.23 | 0.12 | 0.11 | 3.32  | 4.60  |
| Paenisporosarcina sp.                            | 133.64 | 167.94 | 29.99 | 3.75  | 84.43  | 44.71 | 0.25 | 0.22 | 4.38  | 11.26 |
| Jonquetella anthropi E3 33 E1 uid33111           | 23.10  | 20.69  | 8.25  | 2.22  | 42.04  | 40.73 | 0.11 | 0.08 | 1.97  | 2.71  |
| Alloiococcus otitis ATCC 51267 uid52161          | 29.59  | 29.96  | 8.76  | 2.56  | 37.03  | 40.21 | 0.08 | 0.19 | 3.19  | 5.94  |
| Catonella morbi                                  | 36.87  | 35.12  | 9.47  | 2.82  | 68.22  | 39.72 | 0.09 | 0.07 | 7.73  | 7.58  |
| Adlercreutzia equolifaciens                      | 23.65  | 27.92  | 6.62  | 3.82  | 29.36  | 38.01 | 0.10 | 0.09 | 2.13  | 2.86  |
| Slackia exigua ATCC 700122 uid38335              | 46.71  | 17.96  | 7.44  | 3.26  | 29.98  | 37.62 | 0.08 | 0.08 | 3.99  | 3.90  |
| Scardovia inopinata F0304 uid41979               | 52.07  | 89.05  | 7.80  | 3.58  | 47.93  | 36.79 | 0.08 | 0.07 | 3.26  | 3.43  |
| Bulleidia extracta W1219 uid40673                | 33.37  | 24.05  | 6.19  | 2.50  | 42.26  | 35.75 | 0.14 | 0.11 | 2.24  | 2.09  |
| Solobacterium moorei F0204 uid43121              | 31.54  | 28.78  | 3.38  | 1.99  | 31.73  | 35.13 | 0.05 | 0.06 | 1.65  | 1.40  |
| Mollicutes bacterium                             | 25.68  | 33.24  | 11.08 | 2.86  | 32.03  | 35.10 | 0.09 | 0.09 | 1.85  | 7.29  |
| Leptotrichia goodfellowii F0264 uid34093         | 62.85  | 26.16  | 7.78  | 6.73  | 65.26  | 33.27 | 0.13 | 0.12 | 3.57  | 3.29  |
| Collinsella intestinalis DSM 13280 uid29307      | 55.37  | 59.77  | 8.60  | 3.95  | 39.78  | 32.95 | 0.15 | 0.05 | 3.50  | 5.17  |
| Parvimonas oral taxon 393 F0440 uid61837         | 17.89  | 21.84  | 11.37 | 3.97  | 43.33  | 32.81 | 0.09 | 0.15 | 2.56  | 2.41  |
| Mogibacterium timidum                            | 29.66  | 25.41  | 9.07  | 3.35  | 41.40  | 32.32 | 0.09 | 0.06 | 2.10  | 1.82  |
| Filifactor alocis                                | 35.73  | 22.64  | 6.78  | 1.97  | 33.63  | 32.07 | 0.07 | 0.04 | 3.62  | 2.23  |
| Peptostreptococcus anaerobius 653 L uid34105     | 48.62  | 48.17  | 28.90 | 11.35 | 64.33  | 31.37 | 0.19 | 0.31 | 1.16  | 0.70  |
| Centipeda periodontii DSM 2778 uid53025          | 31.37  | 27.17  | 6.23  | 2.45  | 32.74  | 31.28 | 0.05 | 0.06 | 2.60  | 1.70  |
| Sneathia amnii                                   | 35.32  | 37.34  | 2.84  | 1.76  | 49.52  | 31.02 | 0.17 | 0.79 | 1.55  | 1.20  |
| Pyramidobacter piscolens W5455 uid34581          | 25.91  | 20.82  | 5.79  | 1.87  | 33.16  | 30.76 | 0.10 | 0.06 | 2.03  | 3.91  |
| Parasutterella excrementihominis YIT 11859 uid41 | 6.64   | 0.20   | 0.56  | 0.32  | 6.32   | 9.84  | 0.00 | 0.02 | 0.02  | 4.87  |
| Turicibacter HGF1 uid59523                       | 30.39  | 2.84   | 1.89  | 0.77  | 12.27  | 9.06  | 0.01 | 0.07 | 0.68  | 0.82  |
| Methanobrevibacter smithii DSM 2375 uid27821     | 4.15   | 46.95  | 2.86  | 1.37  | 11.89  | 7.51  | 0.07 | 0.00 | 0.50  | 44.80 |

**Table S7. Mean ENV genome counts (RPM).**

| Genome                                  | APOB     |          | Bile     |          | HDL      |          | Liver    |          | Urine    |          |
|-----------------------------------------|----------|----------|----------|----------|----------|----------|----------|----------|----------|----------|
|                                         | SRBIKO   | WT       | SRBIKO   | WT       | SRBIKO   | WT       | SRBIKO   | WT       | SRBIKO   | WT       |
| <i>Pseudomonas fluorescens</i>          | 10441.38 | 10024.31 | 432.1253 | 97.12528 | 20366.48 | 20816.99 | 13.62704 | 12.8481  | 270.8596 | 554.289  |
| <i>Propionibacterium acnes</i>          | 7656.893 | 9636.294 | 835.5112 | 210.4637 | 8000.842 | 6990.82  | 4.563057 | 4.37897  | 576.4113 | 1995.311 |
| <i>Stenotrophomonas maltophilia</i>     | 6529.635 | 7948.452 | 97.98898 | 42.14445 | 3159.071 | 2793.012 | 3.73041  | 3.392313 | 130.2848 | 304.0579 |
| <i>Janthinobacterium lividum</i>        | 3683.407 | 5134.163 | 830.4949 | 161.7239 | 4857.424 | 3418.197 | 6.585493 | 5.299056 | 382.1809 | 1010.644 |
| <i>Pseudomonas putida</i>               | 4501.4   | 4717.613 | 325.7505 | 77.98935 | 7190.048 | 7177.258 | 8.701397 | 9.057773 | 228.9784 | 517.7027 |
| <i>Azotobacter chroococcum</i>          | 2599.03  | 2862.043 | 189.3168 | 47.38598 | 4625.87  | 4670.863 | 3.260278 | 3.457399 | 78.40823 | 241.2425 |
| <i>Polaromonas JS666</i>                | 1346.545 | 1469.561 | 343.7328 | 75.94224 | 1646.013 | 1298.179 | 2.200749 | 2.209759 | 141.4844 | 254.4039 |
| <i>Pseudoxanthomonas suwonensis</i>     | 947.3923 | 1467.529 | 54.86566 | 19.0609  | 886.5587 | 674.1928 | 1.199115 | 1.178846 | 34.92674 | 79.24461 |
| <i>Delftia Cs1</i>                      | 1093.846 | 1299.49  | 239.2626 | 110.3036 | 1458.172 | 991.6503 | 2.334398 | 2.698764 | 127.7165 | 376.9643 |
| <i>Herbiconiux solani</i>               | 1404.343 | 1279.012 | 200.8481 | 54.42156 | 1427.246 | 1164.91  | 2.086304 | 1.651819 | 89.26375 | 276.1174 |
| <i>Exiguobacterium pavilionensis</i>    | 766.4804 | 1166.143 | 68.67924 | 23.95607 | 859.9169 | 844.8524 | 0.697847 | 0.430292 | 18.68669 | 87.29716 |
| <i>Variovorax paradoxus</i>             | 1068.752 | 1116.084 | 261.1077 | 60.60062 | 1480.889 | 1111.862 | 2.251618 | 1.986077 | 106.3545 | 295.4005 |
| <i>Promicromonospora kroppenstedtii</i> | 1108.58  | 1083.767 | 130.2406 | 43.86181 | 1081.35  | 799.8351 | 1.761075 | 1.259411 | 62.19459 | 175.8732 |
| <i>Agrobacterium rhizogenes</i>         | 993.7832 | 993.4637 | 108.0025 | 36.00345 | 664.6669 | 1090.517 | 2.269609 | 2.167087 | 49.39837 | 107.2077 |
| <i>Xanthomonas campestris</i>           | 744.152  | 966.0134 | 52.0048  | 15.66691 | 760.242  | 634.3616 | 1.328536 | 1.320348 | 34.39339 | 51.60496 |
| <i>Acidovorax citrulli</i>              | 853.028  | 954.5343 | 179.7138 | 47.84181 | 1130.495 | 1009.688 | 1.642454 | 1.316959 | 56.54211 | 284.9429 |
| <i>Pseudogulbenkiania ferrooxidans</i>  | 409.1255 | 810.539  | 59.15257 | 15.43259 | 489.8613 | 640.5181 | 0.705132 | 0.958561 | 27.04178 | 74.13109 |
| <i>Ottowia sp.</i>                      | 718.0789 | 788.4567 | 148.6644 | 40.74772 | 786.8431 | 567.7971 | 0.925874 | 0.773961 | 50.80191 | 209.8105 |
| <i>Bdellovibrio bacteriovorus</i>       | 406.7283 | 787.631  | 56.18508 | 26.87837 | 383.3648 | 553.9836 | 1.111532 | 1.011987 | 7.367683 | 71.45819 |
| <i>Idiomarina sp.</i>                   | 333.3445 | 749.5147 | 60.02028 | 14.36038 | 431.8333 | 715.7446 | 1.094226 | 1.070005 | 14.34664 | 37.24749 |
| <i>Hydrogenophaga intermedia</i>        | 651.095  | 709.3008 | 127.2422 | 33.41409 | 774.707  | 561.4605 | 0.991181 | 0.92772  | 40.03114 | 178.9253 |
| <i>Alteromonas stellipolaris</i>        | 445.637  | 707.6104 | 33.15154 | 6.07707  | 516.2865 | 481.6106 | 0.591998 | 0.552357 | 11.2988  | 66.48717 |
| <i>Hahella chejuensis</i>               | 361.5045 | 701.2834 | 32.97849 | 8.369949 | 530.1275 | 605.7584 | 0.793548 | 0.926262 | 19.51384 | 26.37383 |
| <i>Roseateles depolymerans</i>          | 578.5676 | 678.5981 | 122.3405 | 28.10377 | 1122.76  | 487.516  | 1.116486 | 0.923779 | 36.87846 | 180.6249 |
| <i>Mitsuaria chitosanitabida</i>        | 556.2251 | 669.4874 | 142.8594 | 32.07325 | 1286.691 | 551.2016 | 1.334608 | 1.034209 | 41.74907 | 217.1919 |
| <i>Lentibacillus amyloliquefaciens</i>  | 261.7095 | 659.3515 | 43.14242 | 13.6252  | 295.0606 | 378.7194 | 0.448864 | 0.335742 | 11.69156 | 17.78298 |
| <i>Herbaspirillum seropedicae</i>       | 406.4414 | 623.9266 | 145.564  | 31.3967  | 591.6393 | 596.8376 | 0.93325  | 1.086263 | 40.99828 | 71.60012 |
| <i>Paucibacter sp. KCTC 42545</i>       | 636.0493 | 608.6945 | 145.1993 | 32.63311 | 1283.284 | 644.5413 | 1.317221 | 0.94171  | 43.41095 | 274.8806 |
| <i>Xylella fastidiosa</i>               | 504.4232 | 607.9902 | 32.28361 | 10.27471 | 529.6159 | 510.7631 | 0.982018 | 0.876577 | 22.64891 | 37.59586 |
| <i>Buchnera aphidicola</i>              | 226.9688 | 602.7541 | 14.22334 | 4.663113 | 263.5578 | 363.467  | 0.534957 | 0.453095 | 7.347262 | 12.25628 |



|                                    |          |          |          |          |          |          |          |          |          |          |
|------------------------------------|----------|----------|----------|----------|----------|----------|----------|----------|----------|----------|
| Luteimonas sp.                     | 416.9737 | 601.3897 | 27.02228 | 10.40061 | 431.2457 | 371.5225 | 0.764856 | 0.77735  | 20.21138 | 49.77451 |
| Fulvimarina pelagi                 | 427.4679 | 599.1399 | 74.41894 | 22.39872 | 316.5728 | 593.3546 | 1.120087 | 1.059009 | 30.94709 | 69.43499 |
| Bradyrhizobium japonicum           | 611.9741 | 572.7009 | 100.0407 | 28.25619 | 685.8175 | 758.7973 | 1.464851 | 1.573108 | 73.84585 | 112.9321 |
| Geobacter sp.                      | 196.6993 | 565.8524 | 33.18379 | 8.463917 | 219.7991 | 361.9384 | 0.355556 | 0.309814 | 10.23814 | 41.17091 |
| Lysobacter antibioticus            | 474.0963 | 545.3474 | 25.05775 | 10.36693 | 484.4214 | 391.3472 | 0.936366 | 0.793868 | 24.61282 | 37.09617 |
| Marinomonas posidonica             | 463.9697 | 544.296  | 60.21436 | 14.6113  | 747.4472 | 827.9886 | 1.781436 | 2.332674 | 22.41403 | 53.14949 |
| Conexibacter woesei                | 219.44   | 533.9238 | 23.20098 | 4.82012  | 218.1889 | 329.5759 | 0.366185 | 0.206847 | 9.300989 | 14.66925 |
| Altererythrobacter marensis        | 492.5742 | 509.6933 | 71.68676 | 25.2052  | 520.3992 | 479.8471 | 2.125161 | 1.886118 | 52.82933 | 94.71501 |
| Rubrobacter radiotolerans          | 138.8074 | 505.8889 | 11.45694 | 4.406084 | 134.9337 | 278.1492 | 0.158871 | 0.173017 | 2.963657 | 5.148828 |
| Leclercia adecarboxylata           | 460.6076 | 502.7068 | 57.29557 | 14.90717 | 400.5295 | 520.0615 | 2.151574 | 2.609011 | 57.40451 | 119.2087 |
| Thalassolituus oleivorans          | 381.1674 | 487.4053 | 41.60274 | 11.09921 | 723.5377 | 781.562  | 0.827657 | 0.784046 | 14.79542 | 54.13833 |
| Cellvibrio japonicus               | 399.0403 | 466.1564 | 70.62875 | 17.12221 | 747.7012 | 760.922  | 1.104063 | 1.055594 | 28.63851 | 84.41938 |
| Azoarcus sp.                       | 506.3229 | 464.9243 | 102.7927 | 27.57284 | 797.58   | 612.0585 | 2.002427 | 2.785801 | 38.17085 | 174.7745 |
| Dokdonella koreensis               | 245.4924 | 410.1087 | 22.20514 | 6.763321 | 357.9259 | 357.5346 | 0.432595 | 0.508189 | 10.61735 | 21.23581 |
| Methylophaga nitratreducenticresce | 449.1192 | 407.6307 | 30.21872 | 9.22521  | 525.2705 | 426.4514 | 1.03855  | 1.298812 | 17.1171  | 184.3781 |
| Simidiua agarivorans               | 463.525  | 406.6065 | 44.26062 | 15.48194 | 968.0857 | 905.9255 | 1.323023 | 1.410238 | 33.02685 | 88.80472 |
| Anabaena cylindrica                | 771.7591 | 405.4073 | 115.806  | 63.02321 | 558.2063 | 452.488  | 1.537615 | 1.915333 | 38.98246 | 332.8714 |
| Aeromonas hydrophila               | 410.2102 | 400.927  | 57.41643 | 11.35604 | 509.9103 | 1182.336 | 0.893268 | 0.874321 | 24.1268  | 25.17777 |
| Agarivorans gilvus                 | 250.3169 | 398.4339 | 21.13642 | 5.610868 | 442.0943 | 627.593  | 0.451528 | 0.45901  | 9.22288  | 39.51801 |
| Sedimenticola sp.                  | 386.2565 | 393.6201 | 53.51225 | 20.98447 | 432.3609 | 539.1899 | 1.725238 | 1.873661 | 28.44446 | 115.7815 |
| Alcanivorax sp.                    | 382.5755 | 391.7832 | 65.07286 | 15.23708 | 668.1428 | 661.2582 | 1.900559 | 2.183832 | 26.03338 | 45.60215 |
| Beggiatoa leptomitiformis          | 276.3699 | 382.1842 | 53.87702 | 19.15934 | 402.1794 | 338.7334 | 0.668741 | 0.744287 | 17.38898 | 50.62043 |
| Ruegeria mobilis                   | 305.3837 | 381.2449 | 41.89156 | 14.89292 | 299.5074 | 210.546  | 0.520676 | 0.666246 | 23.54356 | 13.91239 |
| Cupriavidus basilensis             | 430.9501 | 365.759  | 140.755  | 32.11816 | 626.0929 | 1083.105 | 1.311996 | 1.113834 | 43.80719 | 132.326  |
| Rheinheimera sp.                   | 209.9996 | 365.4183 | 34.51624 | 7.764514 | 360.0366 | 511.0622 | 0.953843 | 0.946888 | 11.5912  | 23.03758 |
| Arenimonas composti                | 269.7948 | 353.6708 | 21.09448 | 7.477562 | 314.4053 | 324.6709 | 0.526653 | 0.538587 | 11.66634 | 25.47214 |
| Thiobacillus denitrificans         | 232.4086 | 352.2435 | 56.3364  | 18.57576 | 317.347  | 409.4075 | 0.849149 | 0.843687 | 20.72628 | 119.7342 |
| Piscirickettsia salmonis           | 338.7834 | 336.6118 | 78.43621 | 13.29305 | 431.3856 | 437.3996 | 1.024326 | 0.976072 | 16.70555 | 31.11805 |
| Rhizobiales bacterium              | 396.3646 | 333.8277 | 50.42599 | 13.18938 | 293.0361 | 258.6617 | 0.698865 | 0.841272 | 24.02617 | 103.6776 |
| Lactococcus lactis                 | 373.2051 | 328.892  | 38.11403 | 16.92999 | 315.8467 | 282.4018 | 0.473595 | 0.656189 | 24.77407 | 75.23486 |
| Gyнуella sunshinyii                | 228.5759 | 323.7937 | 30.40356 | 10.19299 | 439.7043 | 574.7726 | 0.578694 | 0.597341 | 23.31951 | 38.8163  |
| Marinobacterium sp.                | 316.0837 | 320.608  | 37.0683  | 10.14057 | 584.4037 | 770.0642 | 0.732387 | 0.844493 | 12.75057 | 31.99795 |
| Sulfuricella denitrificans         | 234.1344 | 320.0867 | 85.41548 | 19.30219 | 301.4038 | 320.4118 | 0.788369 | 1.133266 | 23.19302 | 84.54007 |
| Paraburkholderia sacchari          | 380.1396 | 319.9322 | 71.1986  | 25.85214 | 482.5494 | 340.0967 | 0.829124 | 0.634352 | 28.49235 | 98.2642  |
| Regiella insecticola               | 219.8747 | 319.7289 | 21.60082 | 5.093694 | 296.9253 | 423.2644 | 0.351253 | 0.413024 | 5.91624  | 14.09222 |

|                                         |          |          |          |          |          |          |          |          |          |          |
|-----------------------------------------|----------|----------|----------|----------|----------|----------|----------|----------|----------|----------|
| <i>Lelliottia amnigena</i>              | 258.7648 | 318.0992 | 33.19136 | 10.7953  | 294.9124 | 320.8761 | 1.273433 | 1.332551 | 21.8019  | 83.06232 |
| <i>Frateuria aurantia</i>               | 232.7953 | 314.9316 | 24.81153 | 7.277664 | 303.146  | 328.8893 | 0.532935 | 0.536015 | 12.40043 | 164.607  |
| <i>Devosia epidermidihirudinis</i>      | 316.7116 | 314.7651 | 38.4024  | 10.97663 | 267.3566 | 179.514  | 0.534367 | 0.356286 | 19.91411 | 36.97635 |
| <i>Methylomonas methanica</i>           | 194.3251 | 313.5727 | 37.76628 | 7.363892 | 481.616  | 549.2883 | 0.862936 | 0.625438 | 12.29421 | 56.50546 |
| <i>Pandoraea pulmonicola</i>            | 294.2725 | 304.6453 | 69.23851 | 21.69251 | 495.5126 | 385.5412 | 0.756411 | 0.762184 | 25.58162 | 83.33051 |
| <i>Grimontia hollisae</i>               | 190.2332 | 292.4094 | 15.91758 | 4.303807 | 279.6068 | 395.2888 | 0.375609 | 0.385357 | 7.293496 | 22.42073 |
| <i>Legionella hackeliae</i>             | 370.1487 | 292.2562 | 29.1073  | 11.49398 | 408.7625 | 439.3981 | 0.591686 | 0.665423 | 11.30481 | 44.40526 |
| <i>Kluyvera intermedia</i>              | 209.0351 | 289.1098 | 27.52926 | 7.912556 | 298.4683 | 265.5744 | 0.961972 | 0.922334 | 20.21131 | 61.25892 |
| <i>Thioploca ingrca</i>                 | 171.6426 | 285.4721 | 36.13252 | 8.369331 | 262.8974 | 320.1903 | 0.52762  | 0.770577 | 9.516249 | 24.85427 |
| <i>Wohlfahrtiimonas chitiniclastica</i> | 179.4397 | 281.7602 | 39.64594 | 8.219989 | 280.7668 | 380.9208 | 0.412139 | 0.506119 | 8.022656 | 26.16077 |
| <i>Rhodanobacter denitrificans</i>      | 259.6764 | 280.7288 | 27.27677 | 7.887663 | 347.4895 | 348.0885 | 0.537041 | 0.486191 | 14.45887 | 31.80953 |
| <i>Halomonas huangheensis</i>           | 225.2677 | 271.807  | 25.4621  | 6.969989 | 343.1934 | 498.0301 | 0.652001 | 0.70434  | 9.418355 | 42.0879  |
| <i>Gluconacetobacter diazotrophicus</i> | 200.7771 | 271.6153 | 20.62506 | 6.637129 | 143.0947 | 188.8033 | 0.454825 | 0.449086 | 12.51902 | 11.41458 |
| <i>Rhodovulum sp.</i>                   | 255.9759 | 268.6854 | 60.98933 | 13.16889 | 276.7633 | 240.8068 | 0.773496 | 0.716131 | 10.20826 | 35.58599 |
| <i>Glaciecola sp.</i>                   | 172.2331 | 268.4822 | 15.21733 | 4.359944 | 279.5657 | 355.3605 | 0.409391 | 0.436968 | 6.650497 | 31.88698 |
| <i>Kosakonia sacchari</i>               | 226.4069 | 268.407  | 32.96202 | 10.40013 | 282.2313 | 294.1908 | 1.104916 | 1.134661 | 24.96021 | 73.06236 |
| <i>Obesumbacterium proteus</i>          | 288.8497 | 264.4978 | 26.55582 | 8.803611 | 340.2857 | 400.959  | 0.704957 | 0.803811 | 17.43746 | 47.6961  |
| <i>Bordetella pertussis</i>             | 472.6704 | 259.6044 | 75.17948 | 15.93212 | 333.7846 | 293.8678 | 0.582902 | 0.51514  | 33.41223 | 166.2093 |
| <i>Bosea sp.</i>                        | 212.2434 | 251.1976 | 37.41301 | 9.755237 | 246.8488 | 222.6381 | 0.784077 | 0.835581 | 17.47898 | 59.90762 |
| <i>Tatlockia micdadei</i>               | 258.9251 | 248.5667 | 22.23595 | 7.312068 | 294.325  | 361.0225 | 0.404713 | 0.526965 | 8.754795 | 28.2851  |
| <i>Chromohalobacter salexigens</i>      | 200.43   | 245.9837 | 28.27805 | 6.912285 | 345.4733 | 464.4003 | 0.62244  | 0.530402 | 11.10473 | 45.62403 |
| <i>Pluralibacter gergoviae</i>          | 254.7777 | 242.6707 | 38.00243 | 8.610576 | 368.0774 | 319.3993 | 1.049416 | 1.084601 | 25.5599  | 85.04676 |
| <i>Cronobacter malonaticus</i>          | 264.544  | 242.6647 | 129.714  | 32.10406 | 477.4362 | 1460.791 | 1.45711  | 2.555776 | 23.12334 | 39.7258  |
| <i>Congregibacter litoralis</i>         | 197.0061 | 239.9668 | 29.3336  | 6.869261 | 416.8896 | 508.5715 | 0.703672 | 0.686165 | 11.13555 | 19.60334 |
| <i>Advenella kashmirensis</i>           | 282.3127 | 239.393  | 78.19218 | 12.57443 | 285.1339 | 205.4204 | 0.582241 | 0.474247 | 20.89149 | 148.2792 |
| <i>Teredinibacter turnerae</i>          | 255.665  | 239.2822 | 33.55065 | 8.318976 | 519.0748 | 713.754  | 0.619129 | 0.677823 | 18.01455 | 20.51051 |
| <i>Marinobacter sp.</i>                 | 270.0234 | 239.1845 | 47.91138 | 10.53921 | 406.6838 | 502.3498 | 0.801472 | 0.917204 | 19.46777 | 29.28131 |
| <i>Polynucleobacter necessarius</i>     | 226.1456 | 238.099  | 60.96176 | 12.9617  | 279.8777 | 303.5984 | 0.59217  | 0.522565 | 21.62823 | 37.96527 |
| <i>Geobacillus sp. C56-T3</i>           | 464.5293 | 236.9002 | 33.21662 | 16.79789 | 272.1758 | 176.4512 | 0.365932 | 0.473957 | 29.02463 | 51.99107 |
| <i>Asaia sp.</i>                        | 158.1339 | 236.1001 | 14.21518 | 5.483526 | 126.3281 | 111.6217 | 0.336022 | 0.372202 | 8.00574  | 10.80414 |
| <i>Dyella japonica</i>                  | 228.2852 | 235.6251 | 24.22726 | 6.743156 | 293.2486 | 294.4791 | 0.47971  | 0.520854 | 9.995061 | 30.44624 |
| <i>Rahnella aquatilis</i>               | 228.6261 | 229.1685 | 21.64398 | 7.577426 | 289.4702 | 281.1593 | 0.920697 | 0.818007 | 14.49921 | 50.28125 |
| <i>Francisella tularensis</i>           | 156.8996 | 227.9289 | 26.26666 | 6.322891 | 287.8565 | 194.0877 | 0.716306 | 0.525002 | 9.650619 | 30.31689 |
| <i>Thiomargarita nelsonii</i>           | 142.2054 | 224.725  | 75.35003 | 17.64852 | 246.5609 | 301.5837 | 10.00831 | 12.22915 | 26.10261 | 27.54192 |
| <i>Spongiibacter sp.</i>                | 149.3703 | 221.8525 | 21.4719  | 6.216727 | 276.5439 | 330.4934 | 0.426089 | 0.627091 | 7.666492 | 26.36652 |

|                                      |          |          |          |          |          |          |          |          |          |          |
|--------------------------------------|----------|----------|----------|----------|----------|----------|----------|----------|----------|----------|
| <i>Cedecea neteri</i>                | 199.9469 | 217.5554 | 31.94359 | 8.492872 | 252.759  | 285.6909 | 0.857275 | 0.963983 | 16.05844 | 97.48335 |
| <i>Erwinia</i> sp.                   | 166.7546 | 216.5566 | 22.62432 | 7.111393 | 234.1574 | 281.297  | 0.774381 | 0.809546 | 27.14354 | 28.69702 |
| <i>Magnetospirillum caucaseum</i>    | 218.0301 | 214.7092 | 26.67452 | 9.295813 | 187.0291 | 143.8204 | 1.639128 | 1.72282  | 8.32587  | 65.83966 |
| <i>Nitrincola lacisaponensis</i>     | 209.5847 | 213.3837 | 22.26553 | 5.489059 | 401.2331 | 622.9672 | 0.485294 | 0.669043 | 7.636723 | 27.94545 |
| <i>Thiolapillus brandeum</i>         | 166.8506 | 213.0346 | 19.28958 | 5.493216 | 370.2313 | 517.6774 | 0.531281 | 0.477753 | 16.31044 | 29.66265 |
| <i>Gluconobacter frateurii</i>       | 183.9387 | 211.5848 | 16.80669 | 5.879363 | 136.3357 | 126.6651 | 0.333424 | 0.325546 | 9.292285 | 10.69341 |
| <i>Halothiobacillus</i> sp.          | 188.3745 | 211.1746 | 22.89738 | 11.70267 | 335.9647 | 327.4715 | 0.415291 | 0.406082 | 11.35959 | 33.99216 |
| <i>Colwellia</i> sp.                 | 144.9103 | 208.2122 | 25.04039 | 14.62222 | 202.7823 | 170.7612 | 1.096641 | 1.226419 | 11.95275 | 86.66621 |
| <i>Raoultella ornithinolytica</i>    | 192.9396 | 206.4033 | 30.75758 | 8.234869 | 305.8459 | 319.6459 | 0.86856  | 0.985197 | 18.74698 | 62.45569 |
| <i>Yersinia pestis</i>               | 157.3819 | 206.3709 | 20.24333 | 7.276157 | 239.8168 | 271.0651 | 0.631683 | 0.613708 | 11.23502 | 36.17314 |
| <i>Tolumonas auensis</i>             | 185.6699 | 202.3293 | 31.87825 | 8.220521 | 280.225  | 364.3345 | 0.616825 | 0.842445 | 17.30222 | 20.71064 |
| <i>Pseudoalteromonas rubra</i>       | 164.8341 | 194.2418 | 16.48166 | 5.269675 | 268.7468 | 291.2171 | 0.460238 | 0.482585 | 5.643791 | 43.14328 |
| <i>Acetobacter pasteurianus</i>      | 184.7329 | 194.1477 | 18.24313 | 6.077088 | 120.3885 | 155.9784 | 0.343889 | 0.409077 | 14.80447 | 10.25243 |
| <i>Thiocystis violascens</i>         | 167.7017 | 192.8027 | 22.74109 | 6.370258 | 225.7902 | 249.1659 | 0.317917 | 0.401054 | 8.68537  | 10.541   |
| <i>Oceanimonas</i> sp.               | 171.5575 | 192.3399 | 31.51247 | 10.13371 | 241.2256 | 340.6094 | 0.912848 | 1.010097 | 13.69591 | 25.12677 |
| <i>Alkalilimnicola ehrlichii</i>     | 154.4169 | 189.9013 | 22.58282 | 8.432882 | 213.2341 | 201.6856 | 0.283945 | 0.273192 | 8.469742 | 11.73947 |
| <i>Methylococcus capsulatus</i>      | 204.3305 | 176.5421 | 27.83449 | 8.461987 | 403.4917 | 471.0205 | 0.490383 | 0.496147 | 9.168309 | 17.09194 |
| <i>Pantoea</i> sp.                   | 179.7284 | 172.1101 | 26.34749 | 6.705928 | 217.863  | 256.9422 | 0.601919 | 0.722807 | 13.73379 | 40.03797 |
| <i>Kangiella geojedonensis</i>       | 197.6183 | 171.0126 | 48.764   | 20.27445 | 238.5103 | 266.1377 | 0.59275  | 0.952817 | 13.84088 | 19.38033 |
| <i>Ferrimonas balearica</i>          | 133.0402 | 170.2048 | 20.96064 | 4.932878 | 246.5668 | 346.668  | 0.389002 | 0.425321 | 8.362801 | 26.4786  |
| <i>Pectobacterium atrosepticum</i>   | 146.8172 | 167.4896 | 20.72616 | 7.062507 | 216.2087 | 270.8002 | 0.55416  | 0.573526 | 11.55581 | 40.3691  |
| <i>Methylomicrobium alcaliphilum</i> | 190.8816 | 165.9973 | 38.45785 | 16.1     | 206.1048 | 248.2859 | 0.461247 | 0.3958   | 12.95358 | 17.52659 |
| <i>Beggiatoa alba</i>                | 167.3089 | 161.9805 | 41.23946 | 12.94974 | 242.2603 | 241.185  | 0.549572 | 0.62241  | 13.51766 | 32.57867 |
| <i>Chania multitudinisentens</i>     | 181.1857 | 159.055  | 18.67967 | 6.942991 | 197.907  | 240.0692 | 0.589942 | 0.631717 | 14.05399 | 38.3434  |
| <i>Nitrosococcus halophilus</i>      | 187.6587 | 157.9446 | 38.09326 | 15.57816 | 236.8717 | 171.7641 | 0.863156 | 0.994857 | 21.23143 | 15.56046 |
| <i>Shewanella denitrificans</i>      | 205.804  | 153.6972 | 21.94211 | 6.658744 | 194.7101 | 288.2692 | 0.394448 | 0.403214 | 6.526254 | 11.24818 |
| <i>Halorhodospira halochloris</i>    | 133.0359 | 150.1264 | 32.00049 | 7.657684 | 208.3238 | 241.7782 | 0.419464 | 0.448014 | 10.32229 | 17.52257 |
| <i>Ectothiorhodospira</i> sp.        | 134.5812 | 150.1131 | 19.09029 | 5.014308 | 189.9032 | 211.2008 | 0.33289  | 0.327894 | 6.930134 | 11.81158 |
| <i>Wenzhouxiangella marina</i>       | 140.3352 | 149.3583 | 35.05365 | 9.972459 | 210.7498 | 238.1013 | 0.405251 | 0.394313 | 9.817677 | 28.45221 |
| <i>Bibersteinia trehalosi</i>        | 146.5834 | 148.6663 | 26.68911 | 9.091092 | 253.2054 | 204.693  | 0.615427 | 0.669958 | 47.045   | 142.0828 |
| <i>Mannheimia haemolytica</i>        | 165.9174 | 148.5888 | 45.43097 | 12.61928 | 271.0509 | 253.8708 | 2.881753 | 3.041731 | 42.7066  | 140.1543 |
| <i>Deinococcus proteolyticus</i>     | 112.1604 | 147.7897 | 13.79125 | 6.478176 | 119.376  | 94.65438 | 0.238118 | 0.256452 | 12.85711 | 7.897247 |
| <i>Xenorhabdus bovienii</i>          | 126.7567 | 144.4526 | 19.21663 | 5.51151  | 212.3529 | 229.6558 | 0.492683 | 0.520002 | 7.438009 | 27.17506 |
| <i>Dickeya zeae</i>                  | 153.3648 | 143.7989 | 19.02507 | 6.238198 | 224.3553 | 269.0945 | 0.550654 | 0.563013 | 17.96845 | 40.218   |
| <i>Listonella anguillarum</i>        | 128.9319 | 138.4727 | 20.5449  | 5.47501  | 163.4835 | 216.1068 | 0.318041 | 0.835781 | 7.328942 | 14.28581 |

|                                         |          |          |          |          |          |          |          |          |          |          |
|-----------------------------------------|----------|----------|----------|----------|----------|----------|----------|----------|----------|----------|
| <i>Spiribacter salinus</i>              | 167.509  | 136.2409 | 27.90694 | 13.33594 | 218.5575 | 208.2121 | 0.284331 | 0.294303 | 10.43957 | 15.99944 |
| <i>Lacimicrobium alkaliphilum</i>       | 91.65045 | 132.7747 | 13.76818 | 4.318919 | 158.3831 | 168.0168 | 0.260648 | 0.280912 | 6.191122 | 13.42969 |
| <i>Pragia fontium</i>                   | 141.7952 | 129.3702 | 17.85431 | 6.315188 | 200.5452 | 239.7729 | 0.535594 | 0.576864 | 10.41122 | 39.25187 |
| <i>Chloracidobacterium thermophilum</i> | 64.15936 | 128.2831 | 43.5445  | 7.213011 | 83.38445 | 77.42582 | 0.123379 | 0.237289 | 4.702831 | 7.78926  |
| <i>Gilliamella apicola</i>              | 121.616  | 128.2367 | 19.70854 | 6.001709 | 138.4239 | 155.4507 | 0.472854 | 0.452911 | 9.460817 | 17.07726 |
| <i>Photorhabdus temperata</i>           | 148.5263 | 125.1626 | 15.94687 | 7.45147  | 213.6534 | 244.4526 | 0.421318 | 0.462636 | 8.376569 | 37.13934 |
| <i>Leptolyngbya</i> sp.                 | 269.8816 | 123.5723 | 48.25567 | 22.63192 | 233.8575 | 242.5238 | 0.503472 | 0.362871 | 15.41211 | 134.2898 |
| <i>Komagataeibacter hansenii</i>        | 114.6184 | 123.2756 | 8.564105 | 2.055454 | 81.10793 | 70.24852 | 0.143129 | 0.205535 | 2.78258  | 3.805995 |
| <i>Paenibacillus polymyxa</i>           | 142.1162 | 118.2868 | 38.57964 | 11.87721 | 153.0586 | 215.545  | 0.509855 | 0.377535 | 10.69817 | 18.44662 |
| <i>Gallibacterium anatis</i>            | 94.90886 | 113.1708 | 24.56221 | 5.945699 | 138.324  | 149.7782 | 0.542892 | 0.584075 | 9.488958 | 71.53635 |
| <i>Coxiella burnetii</i>                | 108.5306 | 111.9496 | 14.12108 | 5.687017 | 133.3855 | 171.796  | 0.25506  | 0.221439 | 7.398202 | 25.6359  |
| <i>Thioalkalivibrio nitratireducens</i> | 140.1971 | 111.1298 | 27.879   | 6.700901 | 201.0197 | 207.1219 | 0.407215 | 0.407066 | 9.742063 | 12.93485 |
| <i>Frischella perrara</i>               | 138.0919 | 111.1279 | 19.37762 | 6.668561 | 204.5651 | 209.82   | 0.405617 | 0.438127 | 6.773002 | 17.09165 |
| <i>Sodalis praecaptivus</i>             | 120.0669 | 110.6676 | 34.87089 | 7.468402 | 217.8755 | 254.4911 | 0.601707 | 0.669572 | 14.2432  | 25.97558 |
| <i>Allochromatium vinosum</i>           | 112.1534 | 108.5869 | 18.16106 | 5.743975 | 152.7956 | 166.8409 | 0.330975 | 0.317947 | 7.166518 | 10.57845 |
| <i>Hirschia baltica</i>                 | 158.4651 | 107.6926 | 17.22007 | 8.369306 | 81.84456 | 82.58893 | 0.330113 | 0.254109 | 7.153668 | 13.02778 |
| <i>Photobacterium gaetbulicola</i>      | 93.89624 | 106.0413 | 21.2387  | 4.568386 | 162.7576 | 171.0517 | 0.292581 | 0.327881 | 7.482451 | 32.96256 |
| <i>Acidithiobacillus caldus</i>         | 88.14772 | 103.1929 | 22.79434 | 5.68636  | 151.2856 | 181.9892 | 0.345587 | 0.343863 | 8.863366 | 35.19844 |
| <i>Desulfuromonas acetoxidans</i>       | 120.6258 | 101.3656 | 17.21858 | 9.747111 | 127.415  | 101.5319 | 0.329834 | 0.342367 | 12.49019 | 9.875502 |
| <i>Chlamydia pneumoniae</i>             | 17.9511  | 99.87121 | 11.43318 | 2.704182 | 29.27507 | 49.50767 | 0.178832 | 0.12538  | 2.083267 | 3.506039 |
| <i>Thioglobus singularis</i>            | 126.6161 | 95.22582 | 23.45935 | 7.338815 | 159.0141 | 137.3068 | 0.38901  | 0.418999 | 7.918388 | 17.32868 |
| <i>Aliivibrio fischeri</i>              | 108.3175 | 94.39655 | 15.95828 | 4.23705  | 163.5544 | 154.9262 | 0.271425 | 0.326664 | 6.478396 | 24.60609 |
| <i>Brevibacillus brevis</i>             | 174.9304 | 93.45914 | 23.7501  | 9.681565 | 184.3818 | 122.3781 | 0.301544 | 0.494532 | 10.79865 | 164.9132 |
| <i>Vibrio parahaemolyticus</i>          | 83.88364 | 88.25431 | 15.55993 | 4.17371  | 146.7175 | 173.3918 | 0.302353 | 0.388992 | 8.282254 | 16.34723 |
| <i>Wolbachia</i> sp.                    | 60.06514 | 84.88766 | 12.25614 | 3.038059 | 89.2012  | 84.87114 | 0.194687 | 0.167056 | 3.944208 | 30.50286 |
| <i>Spiroplasma chrysopicola</i>         | 30.61493 | 83.54839 | 14.79116 | 4.987894 | 50.75013 | 54.69668 | 0.1042   | 0.415616 | 3.784546 | 10.53832 |
| <i>Moritella viscosa</i>                | 83.47383 | 79.74315 | 47.74029 | 8.902042 | 175.0154 | 358.4786 | 0.690775 | 0.890174 | 5.856067 | 9.464623 |
| <i>Blochmannia floridanus</i>           | 108.813  | 73.26956 | 15.86576 | 5.349133 | 155.5488 | 109.5259 | 0.528254 | 0.530337 | 7.454899 | 9.709125 |
| <i>Zymobacter palmae</i>                | 25.75706 | 46.75405 | 6.007197 | 6.328609 | 50.64746 | 87.16747 | 0.176731 | 0.117548 | 2.841429 | 15.16828 |
| <i>Fictibacillus enclensis</i>          | 115.229  | 28.05671 | 19.00742 | 5.59833  | 102.9794 | 43.59651 | 0.094577 | 0.090513 | 4.13531  | 4.963443 |
| <i>Ureaplasma urealyticum</i>           | 31.12494 | 14.60557 | 3.860481 | 1.796922 | 34.60964 | 38.17884 | 0.06388  | 0.262154 | 2.532755 | 1.529974 |
| <i>Mycoplasma pneumoniae</i>            | 24.17954 | 10.56967 | 9.346498 | 2.994747 | 19.49569 | 51.7848  | 0.057306 | 0.112335 | 1.511789 | 1.610068 |

**Table S8. Fungi genome counts (RPM).**

| Genome                          | APOB     |          | Bile     |          | HDL      |          | Liver    |          | Urine    |          |
|---------------------------------|----------|----------|----------|----------|----------|----------|----------|----------|----------|----------|
|                                 | SRBIKO   | WT       | SRBIKO   | WT       | SRBIKO   | WT       | SRBIKO   | WT       | SRBIKO   | WT       |
| <i>Fusarium oxysporum</i>       | 15697.31 | 13445.86 | 1985.136 | 484.9474 | 15232.19 | 12801.52 | 55.62051 | 64.8901  | 625.1118 | 2035.879 |
| <i>Histoplasma capsulatum</i>   | 11619.72 | 8980.506 | 1758.056 | 462.0398 | 11951.41 | 12543.87 | 55.49659 | 62.33399 | 666.7751 | 1353.75  |
| <i>Cryptococcus neoformans</i>  | 6092.292 | 4555.517 | 715.6396 | 189.9308 | 4101.027 | 4807.551 | 31.26217 | 32.0238  | 411.0778 | 890.6091 |
| <i>Aspergillus niger</i>        | 4590.692 | 2946.055 | 655.305  | 163.1871 | 3249.87  | 3510.839 | 24.91059 | 31.28647 | 219.9401 | 428.964  |
| <i>Saccharomyces cerevisiae</i> | 5242.123 | 3677.244 | 703.679  | 182.3832 | 4508.991 | 3477.469 | 15.09392 | 17.24365 | 236.9088 | 657.8845 |
| <i>Candida albicans</i>         | 4112.733 | 2637.751 | 560.1879 | 138.9744 | 2775.145 | 3253.018 | 17.48146 | 21.20442 | 162.018  | 378.0827 |
| <i>Candida glabrata</i>         | 4061.288 | 2621.49  | 480.7519 | 119.1226 | 2970.4   | 2787.326 | 11.1336  | 12.12618 | 156.3034 | 365.2643 |
| <i>Penicillium chrysogenum</i>  | 2112.639 | 1827.062 | 500.0876 | 146.1811 | 2069.625 | 2620.234 | 14.7705  | 18.35836 | 175.0293 | 283.3209 |

**Table S9. Multivariate analysis of non-host sRNA profiles (WT only).**

| Comparison  | Class       | Level    | Dispersion Fvalue | Dispersion pvalue | Permanova Fvalue | Permanova pvalue |
|-------------|-------------|----------|-------------------|-------------------|------------------|------------------|
| APOB vs HDL | Microbiome  | Parent   | 62.30             | 1.18E-15          | 0.46             | 7.49E-01         |
| APOB vs HDL | Environment | Parent   | 59.02             | 3.68E-15          | 0.37             | 7.87E-01         |
| APOB vs HDL | Fungi       | Parent   | 54.10             | 2.11E-14          | 0.09             | 9.78E-01         |
| APOB vs HDL | Microbiome  | fragment | 27.46             | 2.66E-09          | 1.52             | 9.40E-02         |
| APOB vs HDL | Environment | fragment | 32.39             | 2.11E-10          | 1.70             | 4.80E-02         |
| APOB vs HDL | Fungi       | fragment | 30.00             | 7.03E-10          | 1.42             | 1.10E-01         |

**Table S10. Multivariate analysis of class-independent sRNA profiles compared to liver .**

| Group | Class level Comparison   | F <sub>version</sub> | p <sub>version</sub> | F <sub>anova</sub> | p <sub>anova</sub> |
|-------|--------------------------|----------------------|----------------------|--------------------|--------------------|
| APOB  | Independent APOB vs. L   | 16.83                | 1.47E-03             | 19.56              | 2.00E-03           |
| Bile  | Independent Bile vs. Liv | 2.76                 | 1.22E-01             | 49.74              | 3.00E-03           |
| HDL   | Independent HDL vs. Li   | 80.90                | 1.11E-06             | 15.71              | 1.00E-03           |
| Urine | Independent Urine vs. L  | 7.02                 | 2.44E-02             | 22.07              | 2.00E-03           |
| APOB  | Independent APOB vs E    | 4.19                 | 6.31E-02             | 10.08              | 2.00E-03           |
| APOB  | Independent APOB vs f    | 0.92                 | 3.58E-01             | 2.62               | 2.00E-03           |
| APOB  | Independent APOB vs l    | 0.06                 | 8.16E-01             | 5.83               | 2.00E-03           |
| Bile  | Independent Bile vs HD   | 14.51                | 2.49E-03             | 11.18              | 1.00E-03           |
| Bile  | Independent Bile vs Uri  | 1.75                 | 2.16E-01             | 8.01               | 2.00E-03           |

**Table S11. TIGER comparisons to other pipelines**

| Feature                | TIGER           | Chimira  | Oasis    | ExceRpt         | miRge      |
|------------------------|-----------------|----------|----------|-----------------|------------|
| Web frontend           | N               | Y        | Y        | Y               | N          |
| Alignment tool         | Bowtie          | BLASTn   | STAR     | Bowtie          | Bowtie     |
| Alignment Strategy     | Genome/Database | Database | Database | Genome/Database | Database   |
| Host miRNAs            | Y               | Y        | Y        | Y               | Y          |
| Novel miRNAs           | N               | N        | Y        | N               | N          |
| isomiRs                | Y               | Y        | N        | N               | Y          |
| NTAs                   | Y               | Y        | N        | N               | Y          |
| miRNA SNPs and Editing | N               | Y        | N        | N               | Y          |
| Non-host miRNAs        | Y               | N        | Y        | Y               | Y          |
| tDR                    | Y               | N        | N        | Y               | Y          |
| lncDR                  | Y               | N        | N        | Y               | Y          |
| snoDR                  | Y               | N        | Y        | Y               | Y          |
| snDR                   | Y               | N        | Y        | Y               | Y          |
| miscRNA                | Y               | N        | N        | Y               | Y          |
| piRNA                  | N               | N        | Y        | Y               | N          |
| rDR                    | Y               | N        | Y        | Y               | Y          |
| circRNA                | N               | N        | N        | Y               | N          |
| Bacteria               | Y               | N        | Y        | Y               | N          |
| Archaea                | N               | N        | Y        | Y               | N          |
| Virus                  | N               | N        | Y        | Y               | N          |
| Fungi                  | Y               | N        | N        | Y               | N          |
| Non-host tDR           | Y               | N        | N        | N               | N          |
| Non-host rDR           | Y               | N        | N        | Y               | N          |
| Normalization          | DESeq2          | DEseq2   | DESeq2   | N               | RPMmicrona |
| DE                     | DEseq2          | DEseq2   | DESeq2   | N               | N          |
| DE 2 groups            | Y               | Y        | N        | N               | N          |
| DE Multivariate        | N               | N        | Y        | N               | N          |
| Classification         | N               | N        | Y        | N               | N          |
| GO                     | N               | N        | N        | N               | N          |
| Pathway                | N               | N        | N        | N               | N          |
| Data Vizualization     | Y               | Y        | Y        | Y               | Y          |
| batch                  | Y               | Y        | Y        | Y               | Y          |





Table S13. Comparisons to other pipelines

| Feature                 | APOB        |             |             |             |             | HDL         |             |             |             |             | Liver      |            |            |            |             |
|-------------------------|-------------|-------------|-------------|-------------|-------------|-------------|-------------|-------------|-------------|-------------|------------|------------|------------|------------|-------------|
|                         | Chimira     | Excerptr    | miRge       | Tiger       | Oasis       | Chimera     | Excerptr    | miRge       | Tiger       | Oasis       | Chimera    | Excerptr   | miRge      | Tiger      | Oasis       |
| Total Reads             | 10426434.00 | 10426434.00 | 10426434.00 | 10426434.00 | 10968327.86 | 11839204.29 | 11839204.29 | 11839204.29 | 11839204.29 | 15418341.00 | 9019201.29 | 9019201.29 | 9019201.29 | 9019201.29 | 10019001.71 |
| Host Reads              | NA          | 2107747.14  | NA          | 2671368.57  | 227035.29   | NA          | 2122452.29  | NA          | 2896888.43  | 992068.71   | NA         | 4205631.57 | NA         | 7841642.71 | 1596410.14  |
| Host smallRNA reads     | NA          | NA          | NA          | 2567869.57  | NA          | NA          | NA          | NA          | 2599891.43  | NA          | NA         | NA         | NA         | 7151785.43 | NA          |
| miRNA total reads       | 311143.29   | 238433.51   | 237243.86   | 238748.86   | 203566.14   | 1210229.43  | 919625.98   | 987899.29   | 953958.71   | 826859.00   | 1631118.71 | 1597330.10 | 1596855.29 | 1604115.57 | 1514686.29  |
| miRNA > 10RPM           | 106.29      | 88.14       | 87.86       | 91.57       | 89.14       | 163.71      | 133.29      | 149.71      | 139.00      | 135.00      | 178.57     | 159.57     | 163.86     | 163.14     | 150.14      |
| miRNA > 100RPMM         | 138.71      | 120.00      | 112.29      | 124.00      | 168.57      | 179.43      | 158.29      | 162.00      | 162.86      | 249.86      | 154.29     | 139.00     | 142.71     | 143.71     | 355.57      |
| miR-22-3p RPM           | 43.11       | 42.52       | 43.09       | 43.11       | 41.40       | 276.24      | 264.33      | 276.97      | 271.74      | 207.36      | 328.99     | 307.15     | 318.58     | 317.81     | 279.86      |
| miR-22-3p RPMM          | 1043.15     | 1339.40     | 1359.56     | 1350.37     | 42408.36    | 3070.00     | 3877.86     | 3912.65     | 3854.52     | 93608.02    | 2197.62    | 2061.37    | 2179.87    | 2163.78    | 58113.52    |
| miR-92a-3p RPM          | 1345.89     | 1291.03     | 1348.61     | 1317.49     | 1236.91     | 2979.72     | 2874.46     | 3032.06     | 2939.68     | 2284.63     | 1864.67    | 1777.16    | 1773.96    | 1818.32    | 1474.35     |
| miR-92a-3p RPMM         | 44542.21    | 55360.51    | 59004.65    | 57211.06    | 1229114.81  | 43031.09    | 56916.75    | 56626.52    | 55908.95    | 1059615.05  | 11493.81   | 11117.11   | 11211.06   | 11394.13   | 341504.14   |
| lncDR total reads       | NA          | 3902.90     | NA          | 7784.57     | NA          | NA          | 8537.44     | NA          | 9543.43     | NA          | NA         | 13335.29   | NA         | 5166.43    | NA          |
| snoDR total reads       | NA          | 16173.78    | NA          | 22021.71    | 870.29      | NA          | 11267.87    | NA          | 15443.86    | 5718.57     | NA         | 602487.35  | NA         | 1113487.71 | 3194.14     |
| snDR total reads        | NA          | 25489.81    | NA          | 25355.57    | 1017.86     | NA          | 106257.72   | NA          | 107456.71   | 8121.00     | NA         | 21608.42   | NA         | 22817.43   | 421.29      |
| snDR > 100 RPMsnDR      | NA          | NA          | NA          | 53.71       | NA          | NA          | NA          | NA          | 58.86       | NA          | NA         | NA         | NA         | 96.43      | NA          |
| tDR total reads         | NA          | 1621821.29  | NA          | 1455182.43  | NA          | NA          | 535736.00   | NA          | 486575.00   | NA          | NA         | 517326.14  | NA         | 402458.86  | NA          |
| tDR > 100 RPMtDR        | NA          | 11.86       | NA          | 18.57       | NA          | NA          | 17.00       | NA          | 33.86       | NA          | NA         | 22.00      | NA         | 41.71      | NA          |
| rDR total reads         | NA          | 1026293.14  | NA          | 797402.57   | 531.86      | NA          | 1394877.86  | NA          | 990736.14   | 3347.86     | NA         | 4365498.71 | NA         | 3947849.86 | 994.14      |
| rDR > 100 RPMrDR        | NA          | NA          | NA          | 17.43       | NA          | NA          | NA          | NA          | 18.71       | NA          | NA         | NA         | NA         | 13.43      | NA          |
| piRNA total reads       | NA          | 2281.14     | NA          | NA          | 10572.86    | NA          | 5655.00     | NA          | NA          | 65242.43    | NA         | 40670.86   | NA         | NA         | 7888.57     |
| misc_RNA total reads    | NA          | 20073.65    | NA          | 15971.86    | NA          | NA          | 23336.43    | NA          | 28885.29    | NA          | NA         | 33462.51   | NA         | 51100.00   | NA          |
| other ncRNA total reads | NA          | NA          | 1117470.71  | NA          | NA          | NA          | NA          | 2162839.43  | NA          | NA          | NA         | NA         | 5609577.14 | NA         | NA          |
| mRNA total reads        | NA          | NA          | 14140.71    | NA          | NA          | NA          | NA          | 76421.29    | NA          | NA          | NA         | NA         | 150147.71  | NA         | NA          |
| Nonhost reads           | NA          | NA          | NA          | 3630707.71  | NA          | NA          | NA          | NA          | 3856228.71  | NA          | NA         | NA         | NA         | 39649.00   | NA          |
| % assigned              | 0.03        | 0.21        | 0.13        | 0.60        | 0.02        | 0.09        | 0.17        | 0.24        | 0.57        | 0.05        | 0.16       | 0.46       | 0.81       | 0.87       | 0.15        |

**Table S14. DEseq2 comparison of sRNA changes at the parent level in SR-BI KO vs. WT mice**

| Group | Class | Gene              | FoldChange | pvalue   | padj     | ENSEMBL              |
|-------|-------|-------------------|------------|----------|----------|----------------------|
| APOB  | osRNA | misc_RNA:Vaultrc5 | 6.02       | 5.18E-06 | 5.70E-05 | ENSMUSG00000065145.1 |
| APOB  | osRNA | lincRNA:Malat1    | 11.25      | 8.39E-03 | 4.61E-02 | ENSMUSG00000092341.2 |
| APOB  | tDR   | AsnGTT            | 14.09      | 3.92E-04 | 1.22E-02 |                      |
| Bile  | snDR  | Gm24621           | 4.95       | 4.04E-04 | 2.99E-02 | ENSMUSG00000064613.1 |
| HDL   | miRNA | mmu-miR-143-3p    | 0.20       | 2.60E-06 | 4.26E-04 |                      |
| HDL   | snDR  | Gm25587           | 3.54       | 9.03E-04 | 2.92E-02 | ENSMUSG00000064432.1 |
| HDL   | snDR  | Gm22866           | 3.81       | 9.28E-04 | 2.92E-02 | ENSMUSG00000065881.1 |
| HDL   | snoDR | Snord22           | 9.23       | 3.53E-04 | 2.40E-02 | ENSMUSG00000065087.1 |
| Liver | osRNA | lincRNA:Gm26904   | 0.31       | 3.04E-04 | 1.61E-02 | ENSMUSG00000097560.1 |
| Liver | snDR  | Gm23686           | 0.43       | 4.33E-04 | 2.38E-02 | ENSMUSG00000096391.1 |
| Liver | snoDR | Gm22270           | 0.39       | 2.71E-05 | 8.04E-03 | ENSMUSG00000077222.1 |
| Liver | snoDR | Snord64           | 2.26       | 1.50E-04 | 2.23E-02 | ENSMUSG00000077191.1 |
| Urine | rDR   | n-R5s2            | 0.19       | 8.88E-04 | 3.28E-02 | ENSMUSG00000075918.1 |

Table S15. DEseq2 comparison of sRNA changes at the fragment level in SR-BI KO vs. WT mice

| Group | Class | Sequence                                                    | Length | FoldChange | pvalue   |
|-------|-------|-------------------------------------------------------------|--------|------------|----------|
| HDL   | miRNA | TGAGATGAAGCACTGTAGCTC                                       | 21     | 0.19       | 1.03E-06 |
| HDL   | miRNA | AAAGCTGGGTGAGAGGGC                                          | 19     | 0.05       | 1.38E-06 |
| HDL   | miRNA | TAAGTCACTAGTGGTCCGTT                                        | 21     | 0.06       | 4.21E-06 |
| HDL   | miRNA | TGAGATGAAGTACTGTAGCTC                                       | 21     | 0.09       | 1.46E-05 |
| HDL   | miRNA | TGAGATGAAGCACTGTAGCTCA                                      | 22     | 0.12       | 1.90E-05 |
| HDL   | miRNA | AGAGATGAAGCACTGTAGCTC                                       | 21     | 0.16       | 4.84E-05 |
| HDL   | miRNA | TTGGTCCCTTCAACCAGCT                                         | 20     | 0.13       | 7.73E-05 |
| HDL   | miRNA | TCAGATGAAGCACTGTAGCTC                                       | 21     | 0.15       | 8.39E-05 |
| HDL   | miRNA | TTCACAGTGGCTAAGTTCTGC                                       | 21     | 0.12       | 8.94E-05 |
| HDL   | miRNA | TGAGGTAGTAGATTGTATA                                         | 19     | 0.08       | 9.06E-05 |
| HDL   | miRNA | TGAGGTAGTAGTTGTGCT                                          | 19     | 0.08       | 1.19E-04 |
| HDL   | miRNA | TGACATGAAGCACTGTAGCTC                                       | 21     | 0.19       | 1.85E-04 |
| HDL   | miRNA | TGAGATGAAGCACTGTGGCTC                                       | 21     | 0.18       | 3.09E-04 |
| HDL   | miRNA | GAGATGAAGCACTGTAGCTC                                        | 20     | 0.09       | 3.34E-04 |
| HDL   | miRNA | TAGCTTATCAGACTGATGTT                                        | 20     | 0.14       | 4.05E-04 |
| HDL   | miRNA | TGAGATGAAGCACTGTAGC                                         | 19     | 0.16       | 4.67E-04 |
| HDL   | miRNA | TTCACAGTGGCTAAGTT                                           | 17     | 0.10       | 4.89E-04 |
| HDL   | miRNA | TGAGATGAAGCACCGTAGCTC                                       | 21     | 0.18       | 7.76E-04 |
| HDL   | miRNA | TTGTTCTGCTCGCTCGCGTGA                                       | 21     | 0.11       | 9.42E-04 |
| HDL   | miRNA | TGAGATGAAGAACTGTAGCTC                                       | 21     | 0.21       | 1.10E-03 |
| HDL   | miRNA | TGAGATGAAGCACTGTATCTC                                       | 21     | 0.23       | 1.32E-03 |
| HDL   | miRNA | GCACTGAGATGGGAGTGGTG                                        | 20     | 8.24       | 1.38E-03 |
| APOB  | miRNA | AGAGGTAGTAGTTGCATA                                          | 19     | 9.93       | 2.06E-05 |
| APOB  | miRNA | ATCACATTGCCAGGGATTACCA                                      | 22     | 9.41       | 1.01E-04 |
| Bile  | miRNA | ATCACATTGCCAGGGATTACCA                                      | 22     | 0.08       | 1.49E-04 |
| HDL   | snDR  | GCGGGAAACTCGACTGCATAATTTGTGGTAGTGGGGGACTGCGTTCGCGCTCTCCCCTG | 59     | 7.22       | 2.08E-06 |
| HDL   | snDR  | GCGGGAAACTCGACTGCATAATTTGTGGTAGTGGGGGACTGCGTTCGCGCTCTCCCCTG | 59     | 6.26       | 8.01E-06 |
| HDL   | snDR  | GCGGGAAACTCGGCTGCATAATTTGTGGTAGTGGGGGACTGCGTTCGCGCTCTCCCCTG | 59     | 5.70       | 1.70E-05 |
| HDL   | snDR  | GCGGGAAACTCGACTGCATAATTTGTGGTAGTGGGGGACTGCGTTCGCGCTCTCCCCTG | 59     | 5.21       | 1.85E-05 |
| HDL   | snDR  | GCGGGAAACTCGACTGCATAATTTGTGGTAGTGGGGGACTGCATTGCGCTCTCCCCTG  | 59     | 6.75       | 5.99E-05 |
| HDL   | snDR  | GCGGGAAACTCGACTGCATAATTTGTGGTAGTGGGGGACTGCGTTCGCGCTCTCCCCTG | 59     | 4.21       | 2.12E-04 |
| HDL   | snDR  | ACGGGAAACTCGACTGCATAATTTGTGGTAGTGGGGGACTGCGTTCGCGCTCTCCCCTG | 59     | 4.51       | 2.38E-04 |
| HDL   | snDR  | GCGGGAAACTCGACTGCACAATTTGTGGTAGTGGGGGACTGCGTTCGCGCTCTCCCCTG | 59     | 5.64       | 2.43E-04 |
| HDL   | snDR  | GCGGGAAACTCGACTGCATAATTTGTGGTAGTGGGGGACTGCGTTCGCGCTCTCCCCTG | 59     | 4.29       | 2.69E-04 |
| HDL   | snDR  | GCGGGAAACTCGACTGCATAATTTGTGATAGTGGGGGACTGCGTTCGCGCTCTCCCCTG | 59     | 4.92       | 3.03E-04 |
| HDL   | snDR  | GCGGGAAACTCGACTGCATAATTTGTGGTAGTGGGGGACTGCGTTCGCGCTCTCCCCTG | 59     | 4.14       | 3.83E-04 |
| HDL   | snDR  | GCGGGAAACTCGACTGCATAATTTGTGGTAGTGGGGGCTGCGTTCGCGCTCTCCCCTG  | 59     | 5.84       | 3.92E-04 |
| HDL   | snDR  | GCGGGAAACTCGACTGCATAATTTGTGGTAGTGGAGGACTGCGTTCGCGCTCTCCCCTG | 59     | 4.31       | 6.02E-04 |
| HDL   | snDR  | GCGGGAAACTCGACTGCATAATTTGTGGTAGTGGGGGACTGCGTTCGCGCTCTCCCCTG | 59     | 3.84       | 6.33E-04 |
| HDL   | snDR  | GCGGGAAACTCGACTGCATAATTTGTGGTGGTGGGGGACTGCGTTCGCGCTCTCCCCTG | 59     | 3.61       | 7.57E-04 |
| HDL   | snDR  | GCGGGAAACTCGACCGCATAATTTGTGGTAGTGGGGGACTGCGTTCGCGCTCTCCCCTG | 59     | 5.15       | 7.93E-04 |
| HDL   | snDR  | GCGGGAAACTCGACTGCATAATTTGTGGTAGTGGGGGACTGTGTTGCGCTCTCCCCTG  | 59     | 4.20       | 8.26E-04 |
| HDL   | snDR  | GCGGGAAACTCGACTGCATAATTTGTGGTAGTGGGGGACTGTGTTGCGCTCTCCCCTG  | 59     | 4.37       | 9.41E-04 |
| HDL   | snDR  | GCGGGAAACTCGACTGCATAATTTGTGGTAGTGGGGGACTGCGTTCGCACTCTCCCCTG | 59     | 3.92       | 9.62E-04 |
| HDL   | snDR  | GCGGGAAACTCGACTGCATAATTTGTGCTAGTGGGGGACTGCGTTCGCGCTCTCCCCTG | 59     | 3.55       | 1.15E-03 |
| HDL   | snDR  | GCGGGAAACTCGACTGCATAATTTGTGGTAGTGGGGGACTGCGTTCGCGCTCTCCCCTG | 59     | 4.19       | 1.60E-03 |
| HDL   | snDR  | GCGGGAAACTCACTGCATAATTTGTGGTAGTGGGGGACTGCGTTCGCGCTCTCCCCTG  | 59     | 3.76       | 1.61E-03 |
| HDL   | snDR  | GCGGGAAACTCGACTGCATAATTTGTGGTAGTGGGGGACTGCGTTCGCGCTCTCCCCTG | 59     | 3.94       | 1.64E-03 |
| HDL   | snDR  | GCGGGAAACCCGACTGCATAATTTGTGGTAGTGGGGGACTGCGTTCGCGCTCTCCCCTG | 59     | 3.58       | 1.66E-03 |
| HDL   | snDR  | GCGGGAAACTCGACTGCATAATTTGTGGTAGTGGGGGACTGCGTTCGCGCACTCCCCTG | 59     | 4.00       | 1.66E-03 |
| HDL   | snDR  | GCGGGAAACTCGACTGCATAATTTATGGTAGTGGGGGACTGCGTTCGCGCTCTCCCCTG | 59     | 3.88       | 1.71E-03 |
| HDL   | snDR  | GGGAAACTCGACTGCATAATTTGTGGTAGTGGGGGACTGCGTTCGCGCTCTCCCCTG   | 57     | 3.12       | 1.80E-03 |
| HDL   | snDR  | GCGGGAAACTCGACTGCATAATTTGTGGTAGTGGGGGACTGCGTTCGCGCTCTCCCCTG | 59     | 3.29       | 1.85E-03 |
| HDL   | snDR  | GCGGGAAACTCGACTGCATAATTTGTAGTAGTGGGGGACTGCGTTCGCGCTCTCCCCTG | 59     | 3.17       | 1.94E-03 |
| HDL   | snDR  | ATAATTTGTGGTAGTGGGG                                         | 19     | 6.58       | 2.23E-03 |
| HDL   | snDR  | GCTGGAACCTCGACTGCATAATTTGTGGTAGTGGGGGACTGCGTTCGCGCTCTCCCCTG | 59     | 4.01       | 2.29E-03 |
| HDL   | snDR  | GCGGGAAACTCGACTGCATAATTTGTGGTAGTGGGGGACTGCGTTCGCGCTCTCCCCTG | 59     | 3.67       | 2.72E-03 |
| HDL   | snDR  | GNGGGAAACTCGACTGCATAATTTGTGGTAGTGGGGGACTGCGTTCGCGCTCTCCCCTG | 59     | 4.14       | 3.23E-03 |
| HDL   | snDR  | GCGGGAAACTCGACTGCATAATTTGTGGTAGTGGGGGACTGCGTTCGCGCTCTCCCCTG | 59     | 3.53       | 5.80E-03 |
| HDL   | snDR  | GCGGGAACTCGACTGCATAATTTGTGGTAGTGGGGGACTGCGTTCGCGCTCTCCCCTG  | 59     | 3.12       | 6.18E-03 |
| HDL   | snDR  | GCGGGAAACTCGACTGCATAATTTGTGGTAGTGGGGGACTGCGTTCGCGCTCTCTCTG  | 59     | 3.48       | 6.21E-03 |
| HDL   | snDR  | GTGGGAACTCGACTGCATAATTTGTGGTAGTGGGGGACTGCGTTCGCGCTCTCCCCTG  | 59     | 2.87       | 6.28E-03 |
| HDL   | snDR  | GCGGGAAACTCGACTGCATAATTTGTGGTAGTGGGGGACTGCGTTCGCGCTATCCCCTG | 59     | 2.71       | 6.46E-03 |
| HDL   | snDR  | GCGGGAAACTCGACTGCATAATTTGTGGTAGTGGGGGACTGCGTTCGCGCTCTCCCCG  | 59     | 4.34       | 6.57E-03 |
| HDL   | snDR  | GCGGGAAACTCGACTGCATAATTTGTGGTAGTGGGGGACTGCGTTCGCGCTCACCCCTG | 59     | 2.96       | 6.75E-03 |
| HDL   | snDR  | GCAGGAAACTCGACTGCATAATTTGTGGTAGTGGGGGACTGCGTTCGCGCTCTCCCCTG | 59     | 4.32       | 7.32E-03 |
| HDL   | snDR  | GCGGGAAACTCGACTGCATAATTTGTGGTAGTGGGGGACTGCGTTCGCGCTCTCCCCTG | 59     | 3.42       | 7.47E-03 |
| HDL   | snDR  | GCGGGAAACTCGACTGCATAATTTGTGGTAGTGGGTGACTGCGTTCGCGCTCTCCCCTG | 59     | 2.98       | 8.85E-03 |
| HDL   | snDR  | GCGGGAAACTCGACTGCATAATTTGTGGTAGTGGGGGACTGCGTTCGCTCTCCCCTG   | 59     | 3.27       | 8.90E-03 |
| HDL   | snDR  | GCGGGAAACTCGACTGCATAATTTGTGGTAGTGGGGGCTGCGTTCGCGCTCTCCCCTG  | 59     | 2.78       | 9.00E-03 |
| HDL   | snDR  | GCGGGAAACTCGACTGCATAATTTGTGGTAGTGGGGGACTGCGTTCGCGCTCTCCCCTG | 59     | 4.07       | 9.41E-03 |
| HDL   | snDR  | GCGGGAAACTCGACTGCATAATTTGTGGTAGTGGGGGACTGCGTTCGCGCTCTCCCCTG | 59     | 2.65       | 1.01E-02 |
| HDL   | snDR  | GCGGGAAACTCGACTGCATAATTTGTGGTAGTGGGGGACTGCGTTCGCGCTCTCCCCTG | 59     | 2.87       | 1.04E-02 |
| HDL   | snDR  | GCGGGAAACTCGACTGCATAATTTGTGGTAGTGGGGGACTGCGTTCGCGCTCTCCCAG  | 59     | 2.63       | 1.19E-02 |
| HDL   | snDR  | GCGGGAAACTCGACTGCATAATTTGTGGTAGTGGGGGACTGCGTTCGCGCTCTCCCCTC | 59     | 2.74       | 1.20E-02 |
| HDL   | snDR  | GCGGGAAACTCGACTGCATAATTTGTGGTAGTGGGGGACTGCGTTCGCGCTCTCCCCT  | 58     | 5.57       | 1.21E-02 |
| HDL   | snDR  | GCGGGAAACTCGCTGCATAATTTGTGGTAGTGGGGGACTGCGTTCGCGCTCTCCCCTG  | 59     | 2.88       | 1.37E-02 |
| HDL   | snDR  | GCGGGAAACTCGACTGCATAATTTGTGGTAGTGGGGGACTGCGTTCGCGCTCTCCCCTG | 59     | 2.60       | 1.45E-02 |

|       |         |                                                               |    |       |          |
|-------|---------|---------------------------------------------------------------|----|-------|----------|
| HDL   | snDR    | GGGAAACTCGACTGCATAATTTGTGGTAGTGGGGGACTGCGTTAGCGCTCTCCCCTG     | 57 | 2.36  | 1.46E-02 |
| HDL   | snDR    | GCGGGAGACTCGACTGCATAATTTGTGGTAGTGGGGGACTGCGTTCGCGCTCTCCCCTG   | 59 | 2.61  | 1.54E-02 |
| HDL   | snDR    | GCGGGAAACTCGACTGCATAATTTGTGGTAGAGGGGGACTGCGTTCGCGCTCTCCCCTG   | 59 | 2.58  | 1.60E-02 |
| HDL   | snDR    | GCGGGAAACTCGACTGCATAATTTGTGGTAGTGGGGGACTGCGTTCGCGCTCTCCCCTG   | 59 | 2.72  | 1.62E-02 |
| APOB  | snDR    | AGTCGGCATTGGCAATTTTGACAGTCTCTACGGAGACTG                       | 40 | 28.09 | 2.59E-03 |
| Liver | snDR    | AGTGGGGGACTGCGTTCGCGCTCTCCCCTG                                | 30 | 0.11  | 1.38E-05 |
| Liver | snDR    | TTTTGAGGCCTTGTCTTGACAAGGCT                                    | 27 | 0.13  | 6.82E-05 |
| Liver | snDR    | AATTTTTGAGGCCTTGTCTTGACAAGGCT                                 | 30 | 0.17  | 2.48E-04 |
| Liver | snDR    | AATTTTTGAGGTCCTGCTCGTGCAAGGCT                                 | 30 | 0.17  | 3.01E-04 |
| Liver | snDR    | CAATTTTTGAGGCCTTGTCTTGACAAGGCT                                | 31 | 0.16  | 3.72E-04 |
| Liver | snDR    | CAATTTTTGAGGTCCTGCTCGTGCAAGGCT                                | 31 | 0.19  | 4.34E-04 |
| Liver | snDR    | TTTTGAGGTCCTGCTCGTGCAAGGCT                                    | 27 | 0.18  | 4.64E-04 |
| Liver | snDR    | GTGGTAGTGGGGGACTGCGTTCGCGCTCTCCCCTG                           | 35 | 0.21  | 7.07E-04 |
| Liver | snDR    | TTGTGGTAGTGGGGGACTGCGTTCGCGCTCTCCCCTA                         | 37 | 0.22  | 1.08E-03 |
| Liver | snDR    | GTAGTGGGGGACTGCGTTCGCGCTCTCCCCTG                              | 32 | 0.23  | 1.39E-03 |
| Liver | snDR    | AATTTTTGAGGCCTTGTTCGCAAGGCT                                   | 30 | 0.22  | 1.39E-03 |
| Liver | snDR    | TAAACCAATTTTTGAGGCCTTGTTCGCAAGGCT                             | 37 | 0.23  | 1.77E-03 |
| Liver | snDR    | ACCCGCCTACTTTCGCGGATGCTGGGTGACGCGATCTGCCCG                    | 43 | 0.23  | 2.21E-03 |
| Liver | snDR    | TTTTGAGGCCTTGTTCGCAAGGCT                                      | 27 | 0.17  | 2.24E-03 |
| Urine | snDR    | ATGCGGGAAACTCGACTGCATAATTTGTGGTAGTGGGGGACTGCGTTCGCGCTCTCCCCTG | 61 | 0.03  | 1.20E-03 |
| HDL   | rDR     | TCCCCGCGGGGCCCGCTCGTCCCCGCGCTCGTCCGCACTCTCTTCCCCCTCCT         | 55 | 12.97 | 1.15E-04 |
| HDL   | rDR     | TCCCCGCGGGGCCCGCTCGTCCCCGCGCTCGTCCGCACTCTCTTCCCCCTCCT         | 56 | 15.82 | 5.52E-04 |
| HDL   | rDR     | CTCGTGCATCTATTGAAAGTCAGCCCTCGACACAAGGGTTGT                    | 45 | 4.15  | 1.11E-03 |
| HDL   | rDR     | TCCCCGCGGGGCCCGCTCGTCCCCGCGCTCGTCCGCACTCTCTTCCCCCTCC          | 54 | 8.80  | 1.83E-03 |
| HDL   | rDR     | CCCCGCGGGGCCCGCTCGTCCCCGCGCTCGTCCGCACTCTCTTCCCCCTCC           | 53 | 13.05 | 1.86E-03 |
| HDL   | rDR     | GGGTCCGTCGGGCTGGGGCGCAAGCGGGGCTGGGGCGCGCCGCGGCT               | 49 | 10.28 | 1.94E-03 |
| HDL   | rDR     | GCCGGGAGGTGGAGCACGACGCGTACGCGTTAGGACCCGAAAGA                  | 44 | 16.14 | 2.29E-03 |
| HDL   | rDR     | CCCCGCGGGGCCCGCTCGTCCCCGCGCTCGTCCGCACTCTCTTCCC                | 47 | 5.48  | 2.38E-03 |
| APOB  | rDR     | GACTCTTAGCGGTGGATCACTCGGCTCGTGCG                              | 32 | 0.02  | 1.79E-05 |
| APOB  | rDR     | CCGCGGGGCCCGCTCGTCCCCGCGCTCGTCCGCACTCTCTTCCCCCT               | 39 | 47.91 | 2.96E-05 |
| APOB  | rDR     | TTCCCCGCGGGGCCCGCTCGTCCCCGCGCTCGTCCGCACTCTCTTCCC              | 48 | 0.01  | 4.28E-05 |
| APOB  | rDR     | CCGCGGGGCCCGCTCGTCCCCGCGCTCGTCCGCACTCTCTTCCCCCT               | 49 | 30.23 | 7.00E-04 |
| Liver | rDR     | CGCGTCGCGGCTGGGAAATGTGGCGTACGGAAGAC                           | 35 | 0.15  | 4.21E-06 |
| Liver | rDR     | CGCGTCGCGGCTGGGAAATGTGGCGTACGGAAGACC                          | 37 | 0.17  | 5.08E-06 |
| Liver | rDR     | CGCGTCGCGGCTGGGAAATGTGGCGTACGGAAGAC                           | 36 | 0.19  | 2.92E-05 |
| Liver | rDR     | GTCCCCGCGCTCGTCCGCACTCTCTTCCCCCTCCTT                          | 39 | 0.18  | 3.13E-05 |
| Liver | rDR     | CGCGTCGCGGCTGGGAAATGTGGCGTACGGAAGACCCACTCCCCGCGCC             | 51 | 0.20  | 3.71E-05 |
| Liver | rDR     | GCGCGTCGCGGCTGGGAAATGTGGCGTACGGAAGACC                         | 38 | 0.19  | 3.80E-05 |
| Liver | rDR     | AGTCTGGCACGGTGAAGAGACATGAGAGGTGTAGAATAAGTGGGAGGCC             | 50 | 0.19  | 4.01E-05 |
| Liver | rDR     | CGCGTCGCGGCTGGGAAATGTGGCGTACGGAAGACCC                         | 38 | 0.20  | 5.04E-05 |
| Liver | rDR     | ACCGATTGGATGGTTTGTAGTGGCCCTCGGATCGCCCGCGGGGCT                 | 48 | 0.20  | 7.09E-05 |
| Liver | rDR     | TCTCTACTTGGATAACTGTGGTAATTCTAGAGCTAATACATGCCGACGGGCGGTGACC    | 59 | 0.22  | 7.10E-05 |
| Liver | rDR     | AGTTAAAAGCTCGTAGTTGGATCTTGGGAGCGGGCGGGCTCC                    | 45 | 0.24  | 8.23E-05 |
| Liver | rDR     | GGGGGCCGCGGGCGGGCGGACTCTGGACGCGAGCC                           | 36 | 0.22  | 8.46E-05 |
| Liver | rDR     | ACATGAGAGGTGTAGAATAAGTGGGAGGCC                                | 32 | 0.21  | 8.51E-05 |
| Liver | rDR     | CGGGCGGGCGGGTCCAACCCGCGGGGTTCCGGAGCGGGAGGAACCA                | 48 | 0.23  | 1.51E-04 |
| Liver | rDR     | ACGTAGCAGAGCAGCTCCCTCGTGGATCTATTGAAAGTCAGCCCTCGACACAAGGGTTTGT | 63 | 0.23  | 1.78E-04 |
| Liver | rDR     | AAGGGCTGGTTCGGTTCGGGCTGGGGCGCAAGCGGGGCT                       | 39 | 0.22  | 2.07E-04 |
| Urine | rDR     | GACTCTAGTCTGGCACGGTGAAGAGACATGAGAGGTGTAGAATAAGTGGGAGGCC       | 56 | 0.02  | 2.49E-05 |
| Urine | rDR     | GCGCGGGGAGGTGGAGCACGAGCGTACGCGTTAGGACCCGAAAGAT                | 47 | 0.02  | 3.32E-05 |
| APOB  | tDR     | TCTCTGGTGGTCTAGTGGTTAGGATTCGGGCT                              | 33 | 0.16  | 2.90E-05 |
| Liver | tDR     | GCCTGTACGCGGGAGACCGGGTTCGATCCCCGACGGGGAGCC                    | 45 | 0.17  | 3.91E-06 |
| Liver | tDR     | GCATTGGTAGTTCAATGGTGAATTTCTCCCTCCACGCGGGTGACCCGGGTT           | 53 | 4.80  | 1.87E-05 |
| Bile  | tDR     | GTTTCCGTAGTGTAGTGGTTATCAGCTCGCCT                              | 33 | 5.92  | 5.00E-07 |
| Bile  | tDR     | GACCTCGTGGCGCAATGGTAGCGCTTCTGACT                              | 32 | 8.64  | 3.02E-06 |
| HDL   | snoDR   | GCCCATGATGGTATGAGAGTAGTGGACAGAAGGGATTTCTGAAAAACATTTTCTGAGG    | 59 | 24.64 | 2.64E-05 |
| HDL   | snoDR   | AGTAATGATGATTTCTGGTATTCTGAGTGTCTCGCTGACGCCATACCCGACGCGCTGACC  | 63 | 11.19 | 1.65E-03 |
| APOB  | miscRNA | TTCGAGACCCGCGGGGCTCCCTGGCCCTT                                 | 30 | 25.70 | 7.05E-05 |
| APOB  | miscRNA | TTCGAGACCCGCGGGGCTCCCTGGCCCTT                                 | 31 | 12.52 | 5.15E-03 |
| APOB  | miscRNA | TACCTAACCCGTGAGTGGTTGGTTCGAGACCCGCGGGGCTCCCTGGCCCTT           | 53 | 10.07 | 1.59E-02 |

Table S16. Significantly altered exogenous genome counts in SR-BI KO mice compared to WT mice.

| Group | Genome                          | Fluid | FoldChange | pvalue   | padj     |
|-------|---------------------------------|-------|------------|----------|----------|
| HMB   | <i>Streptomyces</i> sp.         | Urine | 0.08       | 3.24E-06 | 4.17E-04 |
| Fungi | <i>Aspergillus niger</i>        | Bile  | 2.75       | 5.23E-03 | 1.76E-02 |
| Fungi | <i>Candida albicans</i>         | Bile  | 2.73       | 5.58E-03 | 1.76E-02 |
| Fungi | <i>Fusarium oxysporum</i>       | Bile  | 2.70       | 6.60E-03 | 1.76E-02 |
| Fungi | <i>Candida glabrata</i>         | Bile  | 2.58       | 1.03E-02 | 2.05E-02 |
| Fungi | <i>Histoplasma capsulatum</i>   | Bile  | 2.42       | 1.44E-02 | 2.05E-02 |
| Fungi | <i>Saccharomyces cerevisiae</i> | Bile  | 2.44       | 1.73E-02 | 2.05E-02 |
| Fungi | <i>Penicillium chrysogenum</i>  | Bile  | 2.34       | 1.79E-02 | 2.05E-02 |
| Fungi | <i>Cryptococcus neoformans</i>  | Bile  | 2.36       | 2.10E-02 | 2.10E-02 |

**Table S17. DEseq2 comparison of non-host bacterial sRNA changes in SR-BI KO vs. WT mice**

| Collection Group | Sequence                                                        | Length | FoldChange | pvalue   | padj     |
|------------------|-----------------------------------------------------------------|--------|------------|----------|----------|
| ENV              | APOB TCGACGACATCAGCTGCTCCATAAGTTCCCACAC                         | 34     | 35.06      | 6.02E-06 | 7.11E-04 |
| ENV              | Bile TTCAGCGGCGGACGGGTGAGTAATGCCTAGGAATCTGCCTGGTAGTGGGGGACAACGT | 58     | 22.55      | 1.44E-04 | 3.07E-02 |
| ENV              | Urine GATAGTGCGGATTCCCGTGTGAAAGTAGGTCATCGTCAGGCT                | 42     | 0.03       | 3.55E-04 | 1.35E-02 |





**Table S19. Candidate sRNA sequences used for real-time PCR validation.**

| Name            | Sequence                                                    |
|-----------------|-------------------------------------------------------------|
| exo_rDR_Pflo23S | AGAGAACTCGGGTGAAGGAACT                                      |
| exo_rDR_Vsp     | TGGGTGTGACGGGGAAGCAGG                                       |
| exo_rDR_Jliv    | GACCAGGACGTTGATAGGCTGGGTGTGGAAGTG                           |
| miscRNA_Rpph1   | CGGGCCTCATAACCCAATTCAGACTACTCTCCCCCGCCCTC                   |
| snDR_Gm26232    | GCGGGAAACTCGACTGCATAATTTGTGGTAGTGGGGGACTGCGTTCGCGCTCTCCCCTG |
| snDR_Gm22866    | ATAATTTGTGGTAGTGGGG                                         |
| tDR-GluCTC      | TCCCTGGTGGTCTAGTGGTTAGGATTCGGCGCTCTC                        |
| tDR-GlyGCC      | GCATTGGTGGTTCAGTGGTAGAATTCTCGC                              |
